1 **Title: Bacterial community dynamics during embryonic development of the little skate**

2 (*Leucoraja erinacea*)

3 Katelyn Mika,<sup>1,2\*</sup> Alexander S. Okamoto,<sup>3\*</sup> Neil H. Shubin,<sup>1</sup> David B. Mark Welch<sup>4</sup>

4 <sup>1</sup>Organismal Biology and Anatomy, University of Chicago, Chicago, IL, USA

5 <sup>2</sup>Genetic Medicine, University of Chicago, Chicago, USA

6 <sup>3</sup>Human Evolutionary Biology, Harvard University, Cambridge, MA, USA

7 <sup>4</sup>Josephine Bay Paul Center for Comparative Molecular Biology and Evolution, Marine

8 Biological Laboratory, Woods Hole, MA, USA

9 \*These authors contributed equally to this work.

10

11 Correspondence should be addressed to K.M. ([kmmika@uchicago.edu](mailto:kmmika@uchicago.edu)).

12 900 E 57th St, Culver Hall 108 OBA

13 University of Chicago

14 Chicago, IL 60637-1428

15 Phone: 773-834-4774

16

17 Author emails:

18 K.M. ([kmmika@uchicago.edu](mailto:kmmika@uchicago.edu)).

19 A.S.O. ([aokamoto@g.harvard.edu](mailto:aokamoto@g.harvard.edu))

20 N.H.S ([nshubin@uchicago.edu](mailto:nshubin@uchicago.edu))

21 D.B.M.W. ([dmarkwelch@mbl.edu](mailto:dmarkwelch@mbl.edu))

22

23

24

25 **Abstract**

26

27 **Background**

28 Microbial transmission from parent to offspring is hypothesized to be widespread in vertebrates.

29 However, evidence for this is limited as many evolutionarily important clades remain

30 unexamined. There is currently no data on the microbiota associated with any Chondrichthyan

31 species during embryonic development, despite the global distribution, ecological importance,

32 and phylogenetic position of this clade. In this study, we take the first steps towards filling this

33 gap by investigating the microbiota associated with embryonic development in the little skate,

34 *Leucoraja erinacea*, a common North Atlantic species and popular system for chondrichthyan

35 biology.

36 **Methods**

37 To assess the potential for bacterial transmission in an oviparous chondrichthyan, we used 16S

38 rRNA amplicon sequencing to characterize the microbial communities associated with the skin,

39 gill, and egg capsule of the little skate, at six points during ontogeny. Community composition

40 was analyzed using the QIIME2 pipeline and microbial continuity between stages was tracked

41 using FEAST.

42 **Results**

43 We identify site-specific and stage-specific microbiota dominated by the bacterial phyla

44 *Proteobacteria* and *Bacteroidetes*. This composition is similar to, but distinct from, that of

45 previously published data on the adult microbiota of other chondrichthyan species . Our data

46 reveal that the skate egg capsule harbors a highly diverse bacterial community—particularly on

47 the internal surface of the capsule—and facilitates intergenerational microbial transfer to the  
48 offspring. Embryonic skin and external gill tissues host similar bacterial communities; the skin  
49 and gill communities later diverge as the internal gills and skin denticles develop.

## 50 **Conclusions**

51 Our study is the first exploration of the chondrichthyan microbiota throughout ontogeny and  
52 provides the first evidence of vertical transmission in this group.

53

54 **Keywords:** microbial transmission, egg capsule, Chondrichthyes, Rajidae, oviparity

55

## 56 **Introduction**

57 Host-associated microbial communities are often species and tissue-specific due to complex  
58 local interactions between hosts and microbes [1, 2]. Species can acquire their microbiota  
59 through three possible processes: horizontal microbial transmission between conspecifics,  
60 vertical microbial transmission from parents to offspring, or similar environmental sourcing  
61 across the host species [3]. In the first case, microbes can be horizontally transferred between  
62 conspecifics during social interactions and sexual behaviors, potentially homogenizing the  
63 bacterial communities across the host population. Alternatively, vertical transmission allows  
64 parents to directly provide their progeny with symbiotic microbial taxa [4]. Lastly, microbes can  
65 be recruited from the surrounding environment through the host's contact with fluids, substrates,  
66 or diet, allowing for rapid changes in community composition in response to external conditions  
67 over the lifespan of an individual. The relative contributions of these transmission modes likely  
68 covary with life history, balancing the need for intergenerational continuity of genomic  
69 information with the capacity to respond to environmental cues [3, 5].

70  
71 Next-generation sequencing has facilitated the characterization of a broad range of microbiomes  
72 across an increasing diversity of host species; nonetheless, many important marine clades remain  
73 understudied. Chondrichthyans—the earliest branching of the extant, jawed-vertebrate lineages  
74 —constitute one of the major divisions of vertebrates [6]. To date, only a limited number of  
75 culture-independent studies of chondrichthyan microbiota have been conducted [7–13]. Existing  
76 studies of chondrichthyans all focus on species belonging to subclass Elasmobranchii, which  
77 includes sharks, skates, rays, and guitarfish. This literature is skewed towards the skin or gut  
78 microbiota of pelagic sharks [7–11, 13] or the skin microbiota of select ray species [11, 12].  
79 These datasets show that elasmobranch skin microbiota differ from that of the surrounding  
80 environment and are primarily dominated by the phyla *Proteobacteria* and *Bacteroidetes*, similar  
81 to the skin microbiota of other marine species [14–16]. However, this work is limited to adult  
82 elasmobranchs, providing no direct information on juvenile microbiota or intergenerational  
83 transmission in chondrichthyans.

84  
85 In some clades, microbiome composition closely tracks host phylogeny over evolutionary time,  
86 resulting in long-term eco-evolutionary relationships known as phylosymbiosis [17]. Previous  
87 research has identified signatures of phylosymbiosis in elasmobranchs by showing a correlation  
88 between host phylogenetic distance and the taxonomic composition of the microbiota [11]. Of  
89 the three processes of transmission described, horizontal transmission has the most limited  
90 explanatory potential for this finding as chondrichthyan species are largely asocial with  
91 aggregations driven primarily by environmental factors or reproduction [18, 19]. Vertical  
92 transmission or environmental sourcing are more promising potential mechanisms to explain the

93 signature of phylosymbiosis. Data on environmental sourcing in chondrichthyans are limited [9,  
94 12] and are difficult to acquire, while vertical transmission has been unexplored. Given the lack  
95 of data and the hypothesis that vertical transmission is widespread in vertebrates [4], we  
96 investigated the potential for vertical transmission in the model chondrichthyan, the little skate  
97 (*Leucoraja erinacea*).  
98  
99 Oviparity is present in almost half of chondrichthyans and may be the plesiomorphic  
100 reproductive mode for this clade [6, 20]. Like other skates (family: Rajidae), little skates are egg-  
101 laying elasmobranchs that protect their embryos inside egg capsules, colloquially known as a  
102 mermaid's purses [21]. Development of the egg capsule starts in the nidamental organ where the  
103 posterior half is formed before the fertilized egg is deposited into the capsule, at which point the  
104 capsule is rapidly sealed shut [22]. These capsules are then laid on the seafloor and the embryos  
105 develop inside for months to years depending upon the temperature [23, 24] and species [25].  
106 While egg capsules can osmoregulate at all stages, they are initially sealed to anything larger  
107 than small molecules, e.g. glucose and urea can pass through but insulin cannot [26, 27]. Slits at  
108 the anterior and posterior ends of egg capsule open up late in development allowing seawater to  
109 flow through [28]. The potential effects of this environmental shift on the microbiota and host  
110 development are unknown. Upon hatching, juvenile skates are self-sufficient, with no known  
111 parental care [6]. These life history traits—long embryonic development and lack of parental care  
112 after oviposition—pose potential obstacles to vertical microbial transmission in members of this  
113 clade. Thus, skates are a useful system for testing vertical transmission because confounding  
114 parental contact is minimized and any transmitted microbial community is likely stable over a  
115 substantial period of time.

116

117 The little skate is a model system for research in chondrichthyan embryology and development  
118 [24, 29–32] with a sequenced genome [33]. This species is common in the North Atlantic [34]  
119 and easy to obtain through sampling and breeding methods implemented in that region. Little  
120 skate embryos have gestational periods inside the egg capsule of 22–54 weeks depending on the  
121 season [23]. Embryogenesis is divided into thirty-three stages, based on morphological features  
122 [35, 36]. In this study, our goal was to characterize the microbiota associated with embryonic  
123 development of the little skate and to assess the potential for vertical transmission in this species.  
124 To accomplish this, we used 16S rRNA amplicon sequencing to describe and track changes in  
125 bacterial diversity throughout little skate ontogeny by sampling the microbiota of the skin and  
126 gills, as well as the internal liquid and internal surface of the egg capsule at six developmental  
127 stages. These stages are (i) stage 0, when capsules are freshly laid and fertilization cannot be  
128 visually confirmed; (ii) stage 16, an early stage when the embryo can be visually identified; (iii)  
129 stage 26, by which external gill filaments have formed and the egg capsule is still sealed; (iv)  
130 stage 30, when the egg capsule starts to open and the gills remain external; (v) stage 33, by  
131 which time the egg capsule is open and the embryo is fully formed with internal gills; and (vi)  
132 adult. These stages span the duration of embryonic development from shortly after oviposition  
133 until just before hatching and capture distinct periods related to organogenesis and environmental  
134 exposure.

135

## 136 **Materials and Methods**

137

### 138 **Sample Collection**

139 Adult skates used in this study were wild caught in the Northern Atlantic and housed in 15°C  
140 filtered seawater (400-micron mesh followed by sand filtration) at the Marine Resources Center  
141 (MRC) of the Marine Biological Laboratory, Woods Hole, MA. All embryos were laid within  
142 the facility tanks by this adult population. Samples were collected from adult females ( $n=4$ ) by  
143 separately swabbing the gills and the skin around the cloaca. Adult females were not directly  
144 associated with any particular egg capsule used in this study but were all sexually mature, housed  
145 in the MRC breeding tanks, and thus serve as representative, potential mothers. Egg capsules  
146 were sampled at five timepoints: stages 0, 16, 26, 30, and 33 ( $n=4$  each,  $n=20$  total) as per refs.  
147 [35, 36]. Capsules were windowed with a razor blade and the embryos euthanized by cervical  
148 transection. At each stage, samples of the internal liquid ( $n=20$ ) were collected using a 1000 mL  
149 pipette and the inside of the egg capsule was swabbed ( $n=20$ ), as shown in supplementary figure  
150 1. All samples at stage 33 were open, as were two samples (A & D) at stage 30. All other  
151 samples were closed. Samples where the egg capsule slits were already open to the environment  
152 were drained into a collection tube before the egg capsule was windowed. At stages 26, 30 and  
153 33, gill filament samples and tail clippings (~2 cm long) were collected ( $n=4$  each,  $n=24$  total).  
154 Control samples included hand swabs of A.S.O and K.M. and bench swabs before sample  
155 processing both on the day of sample collection and again on the day of DNA extraction ( $n= 6$   
156 total). A sample of the bench after sterilization ( $n=1$ ) was taken on the day of sample collection  
157 as well. Sterile water was collected as a negative control. To broadly sample the marine bacteria  
158 likely to be encountered by skates in the MRC, 1 mL of water was collected in 1.5 mL tubes  
159 from (i) ambient-temperature water tanks ( $n=2$ ); (ii) 15°C tanks housing the skates ( $n=2$ ); (iii)  
160 ocean water from the dock neighboring the pump into the MRC ( $n=2$ ); and (iv) the bucket used  
161 to transfer the skate embryos from the MRC to the dissection station was collected before ( $n=1$ )

162 and after sampling ( $n=1$ ). Prior to sample collection, the bench and all dissection tools were  
163 sterilized using Clorox bleach, followed by 70% ethanol. These surfaces were re-sterilized with  
164 70% ethanol between each egg capsule and with bleach and ethanol between every four egg  
165 capsules. All skate samples were collected on the same day and egg capsules were opened in a  
166 randomly selected order.

167  
168 The DNeasy PowerSoil Kit (Qiagen, Hilden Germany) was used for isolation of the microbial  
169 DNA from each sample. FLOQSwabs (COPAN, Murrieta CA) were used to collect all swab  
170 samples. Swabs trimmed to fit or tissue samples from the gills and tail were placed directly in the  
171 PowerSoil Kit PowerBead tubes after collection. For all liquid samples, 200  $\mu$ L of the sample  
172 was added to the corresponding tube. After collection, samples were left at  $-20^{\circ}\text{C}$  overnight prior  
173 to completion of the extraction protocol. Extraction continued according to the manufacturer's  
174 instructions. The negative control and post-cleaning bench swab failed to amplify, suggesting our  
175 sterilization technique was effective (Supplementary Table S1). Pre-cleaning bench samples  
176 were thus unlikely to have contaminated other samples and were excluded from further analysis.

177

### 178 **Sequencing and Library Preparation**

179 To identify the bacterial community within each sample, the V4-V5 region of the 16S gene was  
180 amplified and sequenced at the Keck Environmental Genomics Facility at the Marine Biological  
181 Laboratory as described [37]. Amplification was done using forward primer (518F)  
182 CCAGCAGCYGCGGTAAN and reverse primers (926R) CCGTCAATTCNTTTRAGT,  
183 CCGTCAATTTCTTTGAGT, and CCGTCTATTCCTTTGANT. Three reverse primers were  
184 used to capture known 16S sequence diversity more effectively than a single highly degenerate



185 primer. PCR cycle structure was 94°C for 2 minutes, 30 cycles of repeating 94°C for 30°  
186 seconds, 57°C for 45 seconds, and 72°C for 1 minute, followed by 72°C for 2 minutes then a hold  
187 at 4°C. Sequencing was done on an Illumina MiSeq platform. Results were then uploaded to the  
188 Visualization and Analysis of Microbial Population Structures (VAMPS) website  
189 (<https://vamaps2.mbl.edu/>) [38]. Raw data was obtained and deposited at the NCBI Short Read  
190 Archive (PRJNA688288).

191 Denoising to address amplicon errors, classifying to identify the taxonomic affiliation of each  
192 sequence, and alpha and beta diversity methods to assess community composition were all  
193 implemented using QIIME2 version 2019.10 [39]. Demultiplexed paired-end sequencing data  
194 was denoised without any trimming and chimeras removed using the DADA2 QIIME2 plugin  
195 [40]. The resulting amplicon sequence variants (ASVs) were classified by training a Naive Bayes  
196 classifier using the SILVA (132 release) 16S only, 99% identity clustered sequences [41–43].  
197 ASVs were collapsed to a maximum specificity of seven taxonomic levels, which corresponds to  
198 the species level. Data were normalized using `transform_sample_counts` in Phyloseq [44, 45] by  
199 dividing the count per ASV within a sample by the total count for that sample, followed by  
200 multiplying this ratio by 10,000.

201

## 202 **Microbial Community Analysis**

203 QIIME2 was used to calculate Pielou’s evenness, Shannon and Chao1 alpha diversity indices  
204 [46], and the Bray-Curtis dissimilarity index for beta diversity [47]. Beta diversity differences  
205 between sample types were visualized using principal coordinate analysis. Between-group  
206 significance levels for alpha and beta diversity were assessed using Kruskal-Wallis [48] and  
207 PERMANOVA [49] tests, respectively, with a Benjamini-Hochberg false discovery rate (FDR)

208 correction. The significance threshold for these tests was set at  $q < 0.05$ . Taxa comprising the  
209 common core microbiota [50] of the (i) egg capsule, (ii) combined external gill and embryonic  
210 skin, (iii) internal gill, and (iv) adult skin were identified using the *feature-table core-features*  
211 function in QIIME2 at a threshold of 75% presence. This threshold was chosen to prioritize taxa  
212 with high levels of occupancy in tissues of interest. Given our small sample size for each tissue  
213 and stage, thresholds higher than 75% result in very few core taxa, while lowering this threshold  
214 results in rapid increases in core taxa numbers.

215 LEfSe (Linear Discriminant Analysis (LDA) Effect Size) was used to identify significantly  
216 enriched taxa and implemented in the Galaxy web application (<http://huttenhower.org/galaxy/>)  
217 [51] using a *P*-value cut-off of 0.05, an LDA score cut-off of 2, and a one-against-all strategy.  
218 FEAST [52] in R v3.6.2 [53] was used to track bacterial community continuity between stages,  
219 with samples from the preceding stage (unless otherwise noted), water, and the investigators'  
220 hands used as potential sources. R Studio (Version 1.2.5033) with the *ggplot2* package [54] was  
221 used to produce all figures.

## 222 **Results**

223 Eighty-four out of eighty-eight samples successfully amplified and were sequenced to produce a  
224 total of 3,516,842 reads and 41,486 ASVs (Supplementary Tables S1 and S2). These ASVs were  
225 classified into 2,255 unique taxonomic identities using the SILVA database. Each sample  
226 contained between 170 and 147,651 reads, with a median value of 36,480. ASV assignments  
227 ranged from 1 to 33,211 reads, with a median value of 29. Rarefaction curves of ASVs recovered  
228 versus sequencing depth showed that sequencing depth was sufficient to discover the majority of  
229 ASVs in a sample (Supplementary Fig. 2).

230

### 231 **Taxonomic characterization of *L. erinacea* microbiota**

232 Skate and egg capsule samples are dominated by ASVs of the phyla *Proteobacteria* (58% of  
233 ASVs), *Bacteroidetes* (21%), and *Planctomycetes* (5%). The dominant classes identified are  
234 *Gammaproteobacteria* (33%), *Alphaproteobacteria* (21%), *Bacteroidia* (21%), and  
235 *Planctomycetacea* (4%) (Fig. 1). Adult skin samples are uniquely enriched for *Bacteroidetes*,  
236 which accounts for 81% of the bacterial community, while in all other samples *Proteobacteria*  
237 are most abundant. Within the control samples, the water samples are dominated by  
238 *Proteobacteria* (87%), followed by *Bacteroidetes* (5%), *Cyanobacteria* (2.6%), and  
239 *Actinobacteria* (2%). The investigators' hand samples are quite distinct from all other samples,  
240 dominated by the phyla *Actinobacteria* (49%), *Cyanobacteria* (31%), *Proteobacteria* (9%) and  
241 *Firmicutes* (5%), showing the characteristic microbial community skew associated with ocean  
242 water exposure [55]. As is typical when investigating poorly studied environments, fewer ASVs  
243 can be categorized at finer phylogenetic resolutions, with <98% being classified at the phylum  
244 level, 97% at the class level, <83% at the order level, <70% at the family level and <60% at the  
245 genus level. The most common families identified are *Rhodobacteraceae* (8.1%),  
246 *Flavobacteriaceae* (6.9%), *Enterobacteraceae* (6.1%), *Saprospiraceae* (3.2%), and *Devosiaceae*  
247 (3.2%) (Supplementary Fig. 3). The most common genera are *Escherichia-Shigella* (6.1%),  
248 *Cutibacterium* (3.2%), *Devosia* (2.0%), and *Lutibacter* (0.9%) (Supplementary Fig. 4).

249

### 250 **Beta and alpha diversity of skate bacterial communities**

251 We explored variation in microbial community composition between samples—Beta diversity—by  
252 sample tissue and stage using Bray-Curtis dissimilarity (Fig. 2). Due to the low number of

253 internal liquid samples at stage 16 which successfully amplified (n=2), these samples cannot be  
254 statistically differentiated from other samples but cluster tightly with stage 0 internal liquid.  
255 Water is likewise distinct from all skate tissues ( $q < 0.05$ ) except internal liquid from stage 33  
256 embryos ( $q < 0.08$ ), at which time the internal liquid contains a significant amount of water due to  
257 the egg capsule opening. All egg capsule samples form a tight cluster distinct ( $q < 0.08$ ) from all  
258 other samples except mid-stage internal liquid (stages 16-30;  $q < 0.50$ ). Gill tissue samples split  
259 into two clusters ( $q < 0.05$ ): the external, embryonic gill stages (26-30), and the internal, later  
260 stages (33-Adult). Internal gill samples are distinct from egg capsule ( $q < 0.05$ ) and late skin  
261 samples (stage 33-Adult,  $q < 0.05$ ) while external gill samples (stage 26-30) cannot be  
262 distinguished from early skin samples (stages 26-30;  $q > 0.20$ ). Stage 30, 33 and adult skin are all  
263 significantly different ( $q < 0.05$ ) from each other. Adult skin is distinct from all other samples  
264 ( $q < 0.05$ ) and separates from all others along PC3 (Fig. 2B). Samples at stage 30 show no clear  
265 separation on open or closed status for any of the tissues examined.

266  
267 Principal coordinate axes generated using the full dataset are primarily driven by the differences  
268 between sampling locations, which may obscure tissue-specific clustering patterns. Therefore,  
269 we stratified the data into individual tissues and reran Bray-Curtis dissimilarity analyses on the  
270 reduced datasets (Supplementary Fig. 5). Egg capsule samples, which have indistinct  
271 subclustering in Fig. 2, show more substructure when analyzed independently, with stages 0, 30,  
272 and 33 forming unique subclusters ( $q < 0.05$ ; Supplementary Fig. 5A). Internal liquid has no  
273 statistically significant subclusters ( $q > 0.09$ ; Supplementary Fig. 5B). Bray-Curtis dissimilarity  
274 analysis on all gill samples supports the internal and external gill subclusters seen in the full  
275 dataset (Supplementary Fig. 5C;  $q < 0.05$ ). Adult skin is distinct from all other skin

276 (Supplementary Fig. 5D;  $q < 0.05$ ) along PC1 which explains 36.5% of the variance within skin  
277 samples. Due to high variability in stage 26 and 30 skin, stage 33 skin is statistically  
278 differentiated ( $q < 0.05$ ) but clusters tightly with the majority of these samples.

279

280 We explored diversity within a sample (alpha diversity), in two different ways: we used the  
281 Shannon index to assess both observed richness (the observed number of ASVs present in each  
282 sample) and evenness (relative abundance of ASVs in each sample): and the Chao1 index to  
283 assess the estimated total richness of the tissue site (the number of ASVs in the population  
284 represented by each sample) (Fig. 3). Total ASV counts and Pielou's evenness for each sample  
285 are listed in Supplementary Table S2. Shannon and Chao1 indices were calculated for each  
286 sample site, splitting gills into external (stages 26-30) and internal (stages 33-Adult), skin into  
287 embryonic (stages 26-33) and adult, and averaging across all stages for egg capsule and internal  
288 liquid. The total richness of the egg capsule is significantly greater than all other sampling sites  
289 by Chao1 (pairwise Kruskal-Wallis,  $q < 0.05$ ). The total richness of the internal liquid increases  
290 with stage, but this trend is not significant; a similar trend is not seen in the egg capsule. When  
291 considering observed richness and evenness, egg capsule samples have a significantly higher  
292 mean Shannon index than all other sites except external gills. Taken together this suggests that  
293 while external gills have a relatively small number of taxa, the community is much more evenly  
294 distributed than most other sites. In contrast, adult skin has a small number of taxa dominated by  
295 a few highly abundant taxa. No other pairwise comparisons were significant using either metric.

296

297 **Microbial source identification for each stage**

298 We performed FEAST source tracking on each stage to assess the relative contribution of each  
299 sampling site in facilitating intergenerational transmission. FEAST estimates the relative  
300 proportional contribution of each potential source and assigns any unexplained components of  
301 the sink bacterial community to an unknown source [52]. A consequence of this emphasis on  
302 proportional mixing is limited power to identify the source of taxa with higher relative  
303 abundances in the sink compared to any source, leading to inflated unknown source values. Since  
304 some taxa are likely enriched during development of the little skate, FEAST values should be  
305 interpreted as identifying the most important sources at each stage, not directly estimating  
306 continuity between timepoints. Samples from the preceding embryonic stage were used as source  
307 pools for the target community (sink) of the focal stage to track microbial continuity until  
308 hatching. At stage 0, swabs from the representative adult females were used as the source pools  
309 (Fig. 4). For all timepoints, water samples were included as an environmental source pool, and  
310 the experimenters' hands were also considered as a source of potential contamination.

311  
312 Hand samples are a negligible source for all samples except stage 0 internal liquid (hand  
313 contribution  $20.1 \pm 5.5\%$ , mean  $\pm$  standard deviation, Fig. 4A). Environmental water rarely  
314 contributes to the little skate microbiota; the exceptions are stage 0 egg capsule ( $14.8 \pm 16.9\%$ )  
315 and stage 33 internal liquid ( $37.3 \pm 38.5\%$ ). In addition to water, the egg capsule microbiota at  
316 stage 0 is similar to the adult gill community ( $50.2 \pm 17.2\%$ , Fig. 4A). At stage 16, the egg capsule  
317 and internal liquid microbiota are both largely conserved from the same tissue of the previous  
318 stage ( $54.6 \pm 10.4\%$  and  $36.5 \pm 35.7\%$  continuity, respectively, Fig. 4B). At stage 26, egg capsule  
319 from the previous stage is the dominant bacterial source for all tissues ( $63.9 \pm 18.4\%$ , Fig. 4C). At  
320 stage 30, egg capsule and internal liquid are sourced primarily from stage 26 egg capsule

321 (68.6±8.9% and 39.0±22.7%, respectively), but gill and skin are sourced from a combination of  
322 the egg capsule, internal liquid, and gill of the previous stage (Fig. 4D). At stage 33, egg capsule  
323 remains contiguous (39.1±24.0%) while the internal liquid draws from egg capsule  
324 (25.6±21.6%) and internal liquid (13.2±8.2%) sources along with environmental water (Fig. 4E).  
325 The stage 33 gill microbiota, comprised of the earliest internal gill samples, is not particularly  
326 similar to any source while the skin is most similar to S30 egg capsule (31.6±7.2%).

327

328 To understand the extent to which taxa from the embryonic microbiota contributes to the adult  
329 bacterial communities, we ran FEAST on the adult samples using stage 33 tissues as the source  
330 pools (Fig. 4F, top). Adult gill has some contribution from stage 33 egg capsule (11.1±6.1%),  
331 internal liquid (14.3±10.3%), and skin (10.6±11.8%). The adult skin bacterial community is  
332 primarily derived from that of the late embryonic egg capsule (73.3±14.0%) (Fig. 4F).

333

#### 334 **Identification of skate core microbiota**

335 For subsequent analyses, we used Bray-Curtis dissimilarity to group samples of interest into four  
336 statistically significant and biological relevant groups: (1) egg capsule (all stages), (2) external  
337 gills (stages 26-30) and embryonic skin (stages 26-33) together, (3) internal gill (stage 33-adult),  
338 and (4) adult skin. Due to heterogeneity in the composition of the internal liquid throughout  
339 ontogeny and lack of large source contributions to other tissues, these samples are not considered  
340 in further analyses.

341

342 To extract the core microbiota of the little skate from our dataset, we identified taxonomic  
343 groups classified to the most specific level possible which were present in 75% or more of the

344 samples comprising the four groups specified above (Supplementary Table S3). Egg capsule  
345 samples have a rich core microbial community with 212 identified taxonomic groups. Skate  
346 samples have smaller core microbiota: combined external gill and embryonic skin have ten,  
347 internal gills have twenty-two, and adult skin has fifty-six groups. There is high overlap between  
348 the core microbiota of these tissues (Table 1) and only egg capsule and adult skin house unique  
349 taxa (Supplementary Table S3).

350  
351 We cross-referenced the genera identified as core to only the adult skin with the full taxa list for  
352 all samples in order to identify taxa exclusively present on adult tissues. This comparison  
353 identified six exclusively adult taxa. *Undibacterium* is the only genus found in all adult skin and  
354 gill samples that does not appear in any egg capsule or embryonic sample. *Spiroplasma*,  
355 *Salimicrobium*, and *Propionivibrio* were each found in a single adult gill sample and in the adult  
356 skin core microbiota. *Sulfurospirillum* sp. *SM-5* and *Aeromonas* were unique to adult skin  
357 tissues.

358

### 359 **Differential abundance of bacterial taxa and predicted functions**

360 For each of the four sample groups in Table 1, we used LEfSe analysis to identify taxa enriched  
361 in abundance ( $P < 0.05$ ,  $LDA > 2$ ; Supplementary Fig. 6). Adult skin is enriched in *Bacteroidia*,  
362 *Vibrio*, and *Mycoplasma agassizii*. Embryonic skin and the external gills are enriched in  
363 *Sphingomonadales*, *Flavobacteriaceae*, and *Escheria-Shigella*. Internal gills are enriched in  
364 *Rhodobacterales* and *Alphaproteobacteria* of *SAR11 clade 1*. Finally, the egg capsule is  
365 characterized by higher abundance of *Alteromonadales*, *Pirellulales*, *Saprospiraceae*, and  
366 *Verrucomicrobia*.



367  
368 Additionally, we used LEfSe to identify shifts in taxa abundance associated with the opening of  
369 the egg capsule slits. We compared open and closed samples of the egg capsule, internal liquid,  
370 and a combined set of the two tissues. While a few taxa were identified as statistically  
371 significant, closer inspection of abundances in each sample did not exhibit the expected pattern  
372 of similar levels of abundance across all samples in one condition compared to the other. Instead,  
373 significance was driven by differences in group means due to a few samples with high  
374 abundances in either the open or closed condition (Supplementary Fig. 7).

375

## 376 **Discussion**

377 Our results show that the phyla *Proteobacteria* and *Bacteroidetes* comprise most of the bacterial  
378 communities associated with the little skate, as has been shown for other chondrichthyans [8, 9,  
379 11–13]. Adult skate skin within our study has a uniquely high proportion of *Bacteroidetes*  
380 (>50%) compared to all other batoids [11, 12]. Within *Proteobacteria*, relative proportions of  
381 each class vary between chondrichthyan species, including the little skate [8, 9, 11–13]. Below  
382 the phylum-level, there is evidence of unique site-specific communities in our study. While all  
383 skate samples included *Gammaproteobacteria*, *Flavobacteriaceae*, *Pirellulaceae*,  
384 *Rhodobacteraceae*, and *Saprospiraceae*, we are unable to identify a common core microbial  
385 community below the family level for all skate samples across all developmental timepoints.  
386 Instead, our data suggest that early embryonic tissues support similar bacterial communities  
387 which differentiate into distinct internal gill and adult skin microbial communities later in  
388 development.

389

390 We sampled two parts of the egg capsule: the inner surface of the capsule and the internal liquid,  
391 which fills the space in the egg capsule not occupied by the developing embryo and yolk. The  
392 microbiota of the egg capsule has the highest taxonomic richness of any tissue sampled and has a  
393 complex core microbiota. This provides evidence that the egg capsule is a rich reservoir of  
394 bacteria for the developing embryo, similar to the dense microbial community observed in squid  
395 egg capsules [56, 57]. While the microbiota of the internal liquid is generally similar to egg  
396 capsule samples, there appears to be a collapse of *Actinobacteria* and *Bacilli* after stage 16, both  
397 rare in the egg capsule, with relative replacement by *Bacteriodia* and *Planctomycetacia*, both  
398 more abundant in the egg capsule. No taxa undergo consistent shifts in abundance in either the  
399 egg capsule or internal liquid upon opening.

400

401 Gills are the primary site of gas and waste exchange with the environment, offering a unique  
402 habitat for microbes. Little skate embryos develop transient external gill filaments between  
403 stages 25 and 32, which later regress into the body to form the adult internal gills [36]. During  
404 early stages, we find that the gill microbial community is undifferentiated from that of the  
405 embryonic skin. The mature gills, however, harbor distinct microbial community, which is  
406 enriched for *Rhodobacterales* and *Alphaproteobacteria* of the *SAR11 clade*. These taxa are also  
407 enriched in the gills of reef fish, suggesting that marine vertebrate gills provide similar microbial  
408 environments [58]. Additionally, gills are the largest site of urea loss in skates [59]. This makes  
409 adult gill tissue particularly well-suited for a commensal relationship with *Nitrosopumilus*, which  
410 is known to use urea as an energy source [60], and is identified as a core bacterial genus in the  
411 gills starting at stage 33.

412

413 Adult skin has the lowest Shannon diversity of any tissue and unlike all other sites its microbiota  
414 is primarily composed of *Bacteroidetes* ASVs assigned to class *Bacteroidia* (81.2%). Previous  
415 work has shown that *Bacteroidetes* are dominant in many niches, are adapted to life on marine  
416 surfaces, play roles in polymer degradation, and contribute to immune function [61, 62]. Given  
417 the abundance of *Bacteroidetes* on skate skin, the functional implications of these ASVs on the  
418 host is a promising area for future research.

419  
420 The low diversity observed in the adult skin samples may be due to the distinct properties of  
421 chondrichthyan skin, which is characterized by dermal denticles and a thin mucus layer [63].  
422 Since the denticles do not develop until around the time of hatching, the biophysical properties of  
423 skate skin change after embryonic development is complete [64]. The skin is hypothesized to  
424 offer a selective microbial environment due to micropatterning of the dermal denticles, reduced  
425 laminar flow, and antimicrobial compounds [9, 65]. In support of this hypothesis, shark skin  
426 micropatterning has been shown to hinder microbial colonization and migration [66, 67]. Our  
427 data show that the adult skate skin bacterial community is distinct from that of embryonic skin,  
428 which clusters closely with the other embryonic tissues (Fig. 2). We hypothesize that the  
429 development of mature denticles shapes the bacterial community of adult chondrichthyan skin,  
430 though this hypothesis requires explicit testing. An alternate possibility for the low-diversity skin  
431 microbiota is that the taxa present possess antimicrobial properties and suppress competition.  
432 While stingray skin microbiota show some antibiotic potential, skate skin microbes exhibit lower  
433 levels of antibiotic activity [68, 69]. Future work is needed to assess the relative contributions of  
434 biophysical properties, antimicrobial secretions, and other mechanisms in shaping the bacterial

435 community on chondrichthyan skin and the relevance of this community to host physiology and  
436 health.

437

438 Environmental sources likely contribute to the microbiota of adult skates. The one environmental  
439 source included in this study, the surrounding water, was not found to contribute meaningfully to  
440 gills or skin at any stage, however, deeper sampling may be necessary to detect low abundance  
441 taxa present in the water column. Identifying other potential environmental sources, such as diet  
442 and benthic substrates, for wild caught adults is not feasible and these sources could not be  
443 sampled for this study. Taxa identified only on adults cannot be explained by vertical  
444 transmission. In this study, we identified only six genera uniquely present on adult tissues. Of  
445 these six, only a single genus, *Undibacterium*, was present in all adult samples of both skin and  
446 gill. *Undibacterium* species have been isolated from other fishes and may play a role in biofilm  
447 degradation [70–73]. Given that this taxon was not detected in embryonic or water samples,  
448 skates likely acquire *Undibacterium* from an unknown environmental source, drastically enrich  
449 this genus from starting levels below the limit of detection, or through horizontal transmission.

450

451 We provide evidence of vertical transmission in an elasmobranch by tracking community  
452 continuity between different developmental stages and tissues. First, we found minimal water  
453 contributions to each sample, with the exception of internal liquid at stage 0 and after egg  
454 capsule opening. Second, skate samples have largely similar taxa between consecutive stages,  
455 with the largest shifts in community composition matching developmental changes in the  
456 physical properties of host tissues. Given the sealed nature of the egg capsule, differences in  
457 community composition are hypothesized to reflect enrichment of existing bacteria rather than

458 recruitment from unknown sources, but this requires additional study to confirm. Finally, only  
459 six taxa were exclusively found on adult tissues, suggesting environmental sourcing may be  
460 limited. While these points are insufficient to show vertical transmission, taken together, along  
461 with the life history of the little skate, they imply vertical microbial transmission occurs. If future  
462 studies identify vertical transmission in this and additional chondrichthyan species, particularly  
463 those with alternate life histories, this would provide a potential mechanism underlying the  
464 signature of phylosymbiosis observed by others in elasmobranchs [11].

465

466 There are additional considerations for this dataset given our experimental design. Since  
467 individual egg capsules were not associated with particular adult females, direct pairwise  
468 comparisons between parent and offspring were not possible. Furthermore, embryonic sampling  
469 is lethal, so each developmental timepoint is comprised of different, unrelated embryos. Thus,  
470 inter-individual variation limits our ability to accurately track all ASVs between timepoints.  
471 While we did sample adult female skin at the cloaca, these samples are unlikely to capture the  
472 extent of diversity housed in the reproductive tract where the egg capsules form [25]. Like most  
473 elasmobranchs, little skates are polyandrous and multiple paternity is likely [74]. Similar  
474 promiscuity has been associated with higher microbial diversity in the female reproductive tract  
475 in other vertebrate groups [75–77], a pattern that may hold for skates. We hypothesize that the  
476 microbiota of the reproductive tract is highly diverse, potentially providing a richer source of  
477 microbiota to the egg capsule than is captured by the adult tissues sampled in this study.  
478 Nonetheless, the precise mechanisms by which the egg capsule is seeded with its rich bacterial  
479 community, and how transmission of pathogenic bacteria is minimized, await further  
480 investigation.

481

482 **Conclusions**

483 This study provides the first exploration of the bacterial communities associated with the little  
484 skate throughout ontogeny and offers many intriguing possibilities for future microbiome  
485 research using this model chondrichthyan. Specifically, we identified a site-specific microbiota  
486 that is likely transferred between generations via the internal surface of the egg capsule and  
487 provide the first evidence that vertical transmission is present in an oviparous elasmobranch  
488 species.

489

490 **List of abbreviations**

491 MRC: Marine Resources Center at the Marine Biological Laboratory, Woods Hole, MA, USA.

492 ASV: Amplicon sequencing variant

493 FDR: False-discovery rate

494 LDA: Linear discriminant analysis

495 PC: Principal coordinate

496

497 **DECLARATIONS**

498

499 **Ethics Approval**

500 All procedures were conducted in accordance with Marine Biological Laboratory IACUC

501 protocol 19-42.

502

503 **Consent for publication**

504 Not applicable.

505

506 **Availability of data and materials**

507 Raw sequencing data is available at the NCBI Short Read Archive (PRJNA688288). All scripts  
508 are available online at [https://github.com/kmmika/Intergenerational-microbial-transmission-in-](https://github.com/kmmika/Intergenerational-microbial-transmission-in-the-little-skate-Leucoraja-erinacea)  
509 [the-little-skate-Leucoraja-erinacea](https://github.com/kmmika/Intergenerational-microbial-transmission-in-the-little-skate-Leucoraja-erinacea).

510

511 **Competing interests**

512 The authors declare no competing interests.

513

514 **Funding**

515 This project was funded by a Microbiome Pilot Project Grant from the Microbiome Center of the  
516 University of Chicago, Marine Biological Laboratory, and Argonne National Laboratory to  
517 D.M.W and N.H.S. This material is based upon work supported by the National Science  
518 Foundation Graduate Research Fellowship to A.S.O. (DGE1745303).

519

520 **Author Contributions**

521 K.M. and A.S.O. conceived of and designed the project in consultation with N.H.S and D.M.W.  
522 K.M. and A.S.O. collected the data, performed the computational analyses, and wrote the  
523 manuscript. All authors edited and approved the final paper.

524

525 **Acknowledgements**

526 The authors thank David Remsen, Dan Calzarette, and the MRC staff for assistance sampling the  
527 skates; Andrew Gillis for inspiration and staging the skate embryos, Tetsuya Nakamura for  
528 assistance with our IACUC protocol, Emily Davenport for directing us to computational  
529 resources, and Nipam H. Patel for use of lab space. We are deeply grateful to Tom A. Stewart,  
530 Terence D. Capellini, and the Carmody Lab for helpful comments on the manuscript.

531

## 532 **References**

- 533 1. Chiarello M, Villéger S, Bouvier C, Auguet JC, Bouvier T. Captive bottlenose dolphins and  
534 killer whales harbor a species-specific skin microbiota that varies among individuals. *Sci Rep.*  
535 2017;7:1–12.
- 536 2. Larsen A, Tao Z, Bullard SA, Arias CR. Diversity of the skin microbiota of fishes: Evidence  
537 for host species specificity. *FEMS Microbiol Ecol.* 2013;85:483–94.
- 538 3. Leftwich PT, Edgington MP, Chapman T. Transmission efficiency drives host-microbe  
539 associations. *Proc R Soc B Biol Sci.* 2020;287.
- 540 4. Funkhouser LJ, Bordenstein SR. Mom Knows Best: The Universality of Maternal Microbial  
541 Transmission. *PLoS Biol.* 2013;11:1–9.
- 542 5. Metcalf CJE, Henry LP, Rebolleda-Gómez M, Koskella B. Why evolve reliance on the  
543 microbiome for timing of ontogeny? *MBio.* 2019;10:1–10.
- 544 6. Compagno LJV. Alternative life-history styles of cartilaginous fishes in time and space.  
545 *Environ Biol Fishes.* 1990;28:33–75.
- 546 7. Givens CE, Ransom B, Bano N, Hollibaugh JT. Comparison of the gut microbiomes of 12  
547 bony fish and 3 shark species. *Mar Ecol Prog Ser.* 2015;518:209–23.
- 548 8. Pogoreutz C, Gore MA, Perna G, Millar C, Nestler R, Ormond RF, et al. Similar bacterial



- 549 communities on healthy and injured skin of black tip reef sharks. *Anim Microbiome*. 2019;1:1–  
550 16.
- 551 9. Doane MP, Haggerty JM, Kacev D, Papudeshi B, Dinsdale EA. The skin microbiome of the  
552 common thresher shark (*Alopias vulpinus*) has low taxonomic and gene function  $\beta$ -diversity.  
553 *Environ Microbiol Rep*. 2017;9:357–73.
- 554 10. Johnny TK, Saidumohamed BE, Sasidharan RS, Bhat SG. Metabarcoding data of bacterial  
555 diversity of the deep sea shark, *Centroscyllium fabricii*. *Data Br*. 2018;21:1029–32.
- 556 11. Doane MP, Morris MM, Papudeshi B, Allen L, Pande D, Haggerty JM, et al. The skin  
557 microbiome of elasmobranchs follows phylosymbiosis, but in teleost fishes, the microbiomes  
558 converge. *Microbiome*. 2020;8:93.
- 559 12. Kearns PJ, Bowen JL, Tlusty MF. The skin microbiome of cow-nose rays (*Rhinoptera*  
560 *bonasus*) in an aquarium touch-tank exhibit. *Zoo Biol*. 2017;36:226–30.
- 561 13. Storo R, Easson C, Shivji M, Lopez J V. Microbiome Analyses Demonstrate Specific  
562 Communities Within Five Shark Species. *Front Microbiol*. 2021;12 February:1–10.
- 563 14. Apprill A, Robbins J, Eren AM, Pack AA, Reveillaud J, Mattila D, et al. Humpback whale  
564 populations share a core skin bacterial community: Towards a health index for marine  
565 mammals? *PLoS One*. 2014;9.
- 566 15. Wahl M, Goecke F, Labes A, Dobretsov S, Weinberger F. The second skin: Ecological role  
567 of epibiotic biofilms on marine organisms. *Front Microbiol*. 2012;3 AUG:1–21.
- 568 16. Chiarello M, Villéger S, Bouvier C, Bettarel Y, Bouvier T. High diversity of skin-associated  
569 bacterial communities of marine fishes is promoted by their high variability among body parts,  
570 individuals and species. *FEMS Microbiol Ecol*. 2015;91:1–12.
- 571 17. Lim SJ, Bordenstein SR. An introduction to phylosymbiosis. *Proc R Soc B Biol Sci*.

- 572 2020;287.
- 573 18. Jacoby DMP, Croft DP, Sims DW. Social behaviour in sharks and rays: Analysis, patterns  
574 and implications for conservation. *Fish Fish.* 2012;13:399–417.
- 575 19. Pratt HL, Carrier JC. A review of elasmobranch reproductive behavior with a case study on  
576 the nurse shark, *Ginglymostoma cirratum* Harold. *Environ Biol Fishes.* 2001;60:157–88.
- 577 20. Dulvy NK, Reynolds JD. Evolutionary transitions among egg-laying, live-bearing and  
578 maternal inputs in sharks and rays. *Proc R Soc B Biol Sci.* 1997;264:1309–15.
- 579 21. Chiquillo KL, Ebert DA, Slager CJ, Crow KD. The secret of the mermaid’s purse:  
580 Phylogenetic affinities within the Rajidae and the evolution of a novel reproductive strategy in  
581 skates. *Mol Phylogenet Evol.* 2014;75:245–51.
- 582 22. Hobson AD. A Note on the Formation of the Egg Case of the Skate. *J Mar Biol Assoc United*  
583 *Kingdom.* 1930;16:577–81. doi:10.1017/S0025315400072945.
- 584 23. Palm BD, Koester DM, Iii WBD, Sulikowski JA. Seasonal variation in fecundity, egg case  
585 viability, gestation, and neonate size for little skates, *Leucoraja erinacea*, in the Gulf of Maine.  
586 *Environ Biol Fishes.* 2011;92:585–9.
- 587 24. Santo V Di. Ocean acidification exacerbates the impacts of global warming on embryonic  
588 little skate, *Leucoraja erinacea* (Mitchill). *J Exp Mar Bio Ecol.* 2015;463:72–8.
- 589 25. Serra-Pereira B, Figueiredo I, Gordo LS. Maturation of the gonads and reproductive tracts of  
590 the thornback Ray *Raja Clavata*, with comments on the development of a standardized  
591 reproductive terminology for oviparous elasmobranchs. *Mar Coast Fish.* 2011;3:160–75.
- 592 26. Lombardi J, Files T. Egg capsule structure and permeability in the viviparous shark, *Mustelus*  
593 *canis.* *J Exp Zool.* 1993;267:76–85. doi:10.1002/jez.1402670111.
- 594 27. Hornsey DJ. Permeability coefficients of the egg-case membrane of *Scyliorhinus canicula* L.

- 595    Experientia. 1978;34:1596–7. doi:10.1007/BF02034696.
- 596    28. Koob TJ, Summers A. On the hydrodynamic share of little skate (*Raja erinacea*) egg  
597    capsules. Bull Mt Desert Isl Biol Lab. 1996;35:108–11.
- 598    29. Marconi A, Hancock-Ronemus A, Gillis JA. Adult chondrogenesis and spontaneous cartilage  
599    repair in the skate, *Leucoraja erinacea*. Elife. 2020;9:1–26.
- 600    30. Nakamura T, Klomp J, Pieretti J, Schneider I, Gehrke AR, Shubin NH. Molecular  
601    mechanisms underlying the exceptional adaptations of batoid fins. Proc Natl Acad Sci.  
602    2015;112:15940–5. doi:10.1073/pnas.1521818112.
- 603    31. Turner N, Mikalauskaite D, Barone K, Flaherty K, Senevirathne G, Adachi N, et al. The  
604    evolutionary origins and diversity of the neuromuscular system of paired appendages in batoids.  
605    Proc R Soc B Biol Sci. 2019;286.
- 606    32. Criswell KE, Coates MI, Gillis JA. Embryonic development of the axial column in the little  
607    skate, *Leucoraja erinacea*. J Morphol. 2017;278:300–20.
- 608    33. Wyffels J, King BL, Vincent J, Chen C, Wu CH, Polson SW. SkateBase, an elasmobranch  
609    genome project and collection of molecular resources for chondrichthyan fishes. F1000Research.  
610    2014;3 May.
- 611    34. Packer DB, Zetlin CA, Vitaliano JJ. Little Skate, *Leucoraja erinacea*, Life History and  
612    Characteristics. 2003.
- 613    35. Ballard WW, Mellinger J, Lechenault H. A Series of Normal Stages for Development of  
614    *Scyliorhinus canicula*, the Lesser Spotted Dogfish (Chondrichthyes: Scyliorhinidae). J Exp Zool.  
615    1993;267:318–36.
- 616    36. Maxwell EE, Frobish NB, Heppleston AC. Variability and Conservation in Late  
617    Chondrichthyan Development: Ontogeny of the Winter Skate (*Leucoraja ocellata*). Anat Rec.

- 618 2008;291:1079–87.
- 619 37. Nelson MC, Morrison HG, Benjamino J, Grim SL, Graf J. Analysis, Optimization and  
620 Verification of Illumina-Generated 16S rRNA Gene Amplicon Surveys. *PLoS One*.  
621 2014;9:e94249. doi:10.1371/journal.pone.0094249.
- 622 38. Huse SM, Mark Welch DB, Voorhis A, Shipunova A, Morrison HG, Eren AM, et al.  
623 VAMPS: a website for visualization and analysis of microbial population structures. *MBC*  
624 *Bioinforma*. 2014;15.
- 625 39. Bolyen E, Rideout JR, Dillon MR, Bokulich NA, Abnet CC, Al-Ghalith GA, et al.  
626 Reproducible, interactive, scalable and extensible microbiome data science using QIIME 2. *Nat*  
627 *Biotechnol*. 2019;37:852–7. doi:10.1038/s41587-019-0209-9.
- 628 40. Callahan BJ, McMurdie PJ, Rosen MJ, Han AW, Johnson AJA, Holmes SP. DADA2: High-  
629 resolution sample inference from Illumina amplicon data. *Nat Methods*. 2016;13:581–3.
- 630 41. Yilmaz P, Parfrey LW, Yarza P, Gerken J, Pruesse E, Quast C, et al. The SILVA and “All-  
631 species Living Tree Project (LTP)” taxonomic frameworks. *Nucleic Acids Res*. 2014;42:D643–  
632 8. doi:10.1093/nar/gkt1209.
- 633 42. Bokulich NA, Kaehler BD, Rideout JR, Dillon M, Bolyen E, Knight R, et al. Optimizing  
634 taxonomic classification of marker-gene amplicon sequences with QIIME 2’s q2-feature-  
635 classifier plugin. *Microbiome*. 2018;6:90. doi:10.1186/s40168-018-0470-z.
- 636 43. Pedregosa F, Varoquaux G, Gramfort A, Michel V, Thirion B, Grisel O, et al. Scikit-learn:  
637 Machine Learning in Python. *J Mach Learn Res*. 2011;12:2825–30.
- 638 44. McMurdie PJ, Holmes S. Phyloseq: An R Package for Reproducible Interactive Analysis and  
639 Graphics of Microbiome Census Data. *PLoS One*. 2013;8.
- 640 45. Callahan BJ, Sankaran K, Fukuyama JA, McMurdie PJ, Holmes SP. Bioconductor Workflow

- 641 for Microbiome Data Analysis: from raw reads to community analyses. *F1000Research*.  
642 2016;5:1492. doi:10.12688/f1000research.8986.2.
- 643 46. Weiss S, Xu ZZ, Peddada S, Amir A, Bittinger K, Gonzalez A, et al. Normalization and  
644 microbial differential abundance strategies depend upon data characteristics. *Microbiome*.  
645 2017;5:27. doi:10.1186/s40168-017-0237-y.
- 646 47. Faith DP, Minchin PR, Belbin L. Compositional dissimilarity as a robust measure of  
647 ecological distance. *Vegetatio*. 1987;69:57–68. doi:10.1007/BF00038687.
- 648 48. Kruskal WH, Wallis WA. Use of Ranks in One-Criterion Variance Analysis. *J Am Stat*  
649 *Assoc*. 1952;47:583. doi:10.2307/2280779.
- 650 49. Anderson MJ. Permutational Multivariate Analysis of Variance (PERMANOVA). In: Wiley  
651 *StatsRef: Statistics Reference Online*. Chichester, UK: John Wiley & Sons, Ltd; 2017. p. 1–15.  
652 doi:10.1002/9781118445112.stat07841.
- 653 50. Risely A. Applying the core microbiome to understand host–microbe systems. *J Anim Ecol*.  
654 2020; November 2019:1–10.
- 655 51. Segata N, Izard J, Waldron L, Gevers D, Miropolsky L, Garrett WS, et al. Metagenomic  
656 biomarker discovery and explanation. *Genome Biol*. 2011;12.
- 657 52. Shenhav L, Thompson M, Joseph TA, Briscoe L, Furman O, Bogumil D, et al. FEAST: fast  
658 expectation-maximization for microbial source tracking. *Nat Methods*. 2019;16:627–32.  
659 doi:10.1038/s41592-019-0431-x.
- 660 53. R Core Team. R: A language and environment for statistical computing. 2013. [http://www.r-](http://www.r-project.org/)  
661 [project.org/](http://www.r-project.org/).
- 662 54. Wickham H. *ggplot2: Elegant Graphics for Data Analysis*. 2016.
- 663 55. Nielsen MC, Jiang SC. Alterations of the human skin microbiome after ocean water

- 664 exposure. *Mar Pollut Bull.* 2019;145 February:595–603. doi:10.1016/j.marpolbul.2019.06.047.
- 665 56. Barbieri E, Paster BJ, Hughes D, Zurek L, Moser DP, Teske A, et al. Phylogenetic  
666 characterization of epibiotic bacteria in the accessory nidamental gland and egg capsules of the  
667 squid *Loligo pealei* (Cephalopoda: Loliginidae). *Environ Microbiol.* 2001;3:151–67.
- 668 57. Kerwin AH, Nyholm S V. Symbiotic bacteria associated with a bobtail squid reproductive  
669 system are detectable in the environment, and stable in the host and developing eggs. *Environ*  
670 *Microbiol.* 2017;19:1463–75.
- 671 58. Pratte ZA, Besson M, Hollman RD, Stewart FJ. The gills of reef fish support a distinct  
672 microbiome influenced by hostspecific factors. *Appl Environ Microbiol.* 2018;84:1–15.
- 673 59. Hazon N, Wells A, Pillans RD, Good JP, Anderson WG, Franklin CE. Urea based  
674 osmoregulation and endocrine control in elasmobranch fish with special reference to  
675 euryhalinity. *Comp Biochem Physiol - B Biochem Mol Biol.* 2003;136:685–700.
- 676 60. Qin W, Heal KR, Ramdasi R, Kobelt JN, Martens-Habbena W, Bertagnolli AD, et al.  
677 *Nitrosopumilus maritimus* gen. nov., sp. nov., *Nitrosopumilus cobalaminigenes* sp. nov.,  
678 *Nitrosopumilus oxyclinae* sp. nov., and *Nitrosopumilus ureiphilus* sp. nov., four marine  
679 ammoniaoxidizing archaea of the phylum thaumarchaeo. *Int J Syst Evol Microbiol.*  
680 2017;67:5067–79.
- 681 61. Fernández-Gómez B, Richter M, Schüller M, Pinhassi J, Acinas SG, González JM, et al.  
682 Ecology of marine bacteroidetes: A comparative genomics approach. *ISME J.* 2013;7:1026–37.
- 683 62. Troy EB, Kasper DL. Beneficial effects of *Bacteroides fragilis* polysaccharides on the  
684 immune system. *Front Biosci.* 2010;15:25–34. doi:10.2741/3603.
- 685 63. Meyer W, Seegers U. Basics of skin structure and function in elasmobranchs: A review. *J*  
686 *Fish Biol.* 2012;80:1940–67.

- 687 64. Cooper RL, Thiery AP, Fletcher AG, Delbarre DJ, Rasch LJ, Fraser GJ. An ancient Turing-  
688 like patterning mechanism regulates skin denticle development in sharks. *Sci Adv.* 2018;4:1–11.
- 689 65. Lee M. Shark Skin: Taking a Bite Out of Bacteria. In: Lee M, editor. *Remarkable Natural*  
690 *Material Surfaces and Their Engineering Potential*. Cham: Springer International Publishing;  
691 2014. p. 1–163. doi:10.1007/978-3-319-03125-5.
- 692 66. Reddy ST, Chung KK, McDaniel CJ, Darouiche RO, Landman J, Brennan AB.  
693 Micropatterned surfaces for reducing the risk of catheter-associated urinary tract infection: An in  
694 vitro study on the effect of sharklet micropatterned surfaces to inhibit bacterial colonization and  
695 migration of uropathogenic *Escherichia coli*. *J Endourol.* 2011;25:1547–52.
- 696 67. Mann EE, Manna D, Mettetal MR, May RM, Dannemiller EM, Chung KK, et al. Surface  
697 micropattern limits bacterial contamination. *Antimicrob Resist Infect Control.* 2014;3.
- 698 68. Ritchie KB, Schwarz M, Mueller J, Lapacek VA, Merselis D, Walsh CJ, et al. Survey of  
699 antibiotic-producing bacteria associated with the epidermal mucus layers of rays and Skates.  
700 *Front Microbiol.* 2017;8 JUL:1050.
- 701 69. Cho SH, Lee BD, An H, Eun JB. Kenojeinin I, antimicrobial peptide isolated from the skin  
702 of the fermented skate, *Raja kenojei*. *Peptides.* 2005;26:581–7.
- 703 70. Morohoshi T, Oi T, Suzuki T, Sato S. Identification and characterization of a novel  
704 extracellular polyhydroxyalkanoate depolymerase in the complete genome sequence of  
705 *Undibacterium* sp. KW1 and YM2 strains. *PLoS One.* 2020;15:1–11.
- 706 71. Kämpfer P, Irgang R, Busse HJ, Poblete-Morales M, Kleinhagauer T, Glaeser SP, et al.  
707 *Undibacterium danionis* sp. Nov. isolated from a zebrafish (*Danio rerio*). *Int J Syst Evol*  
708 *Microbiol.* 2016;66:3625–31.
- 709 72. Lee SY, Kang W, Kim PS, Kim HS, Sung H, Shin NR, et al. *Undibacterium piscinae* sp.

- 710 Nov., isolated from Korean shiner intestine. *Int J Syst Evol Microbiol.* 2019;69:3148–54.
- 711 73. Lokesh J, Kiron V, Sipkema D, Fernandes JMO, Moum T. Succession of embryonic and the  
712 intestinal bacterial communities of Atlantic salmon (*Salmo salar*) reveals stage-specific microbial  
713 signatures. *Microbiologyopen.* 2019;8:1–16.
- 714 74. Fitzpatrick JL, Kempster RM, Daly-Engel TS, Collin SP, Evans JP. Assessing the potential  
715 for post-copulatory sexual selection in elasmobranchs. *J Fish Biol.* 2012;80:1141–58.
- 716 75. MacManes MD. Promiscuity in mice is associated with increased vaginal bacterial diversity.  
717 *Naturwissenschaften.* 2011;98:951–60.
- 718 76. White J, Richard M, Massot M, Meylan S. Cloacal bacterial diversity increases with multiple  
719 mates: Evidence of sexual transmission in female common lizards. *PLoS One.* 2011;6.
- 720 77. Yildirim S, Yeoman CJ, Janga SC, Thomas SM, Ho M, Leigh SR, et al. Primate vaginal  
721 microbiomes exhibit species specificity without universal *Lactobacillus* dominance. *ISME J.*  
722 2014;8:2431–44.
- 723
- 724



725 **FIGURE AND TABLE LEGEND**

726

727 **Figure 1: Taxonomic composition of embryonic and adult skate bacterial communities.**

728 Relative abundance of the top ten bacterial classes in the dataset are shown for each site and  
729 timepoint as well as for water and hand controls. First, classes of phylum *Proteobacteria* are  
730 shown in shades of blue, followed by other classes ordered alphabetically. For the controls, n=4  
731 for hand and n=8 for water samples.

732

733 **Figure 2: Principal coordinate analysis plots of little skate bacterial samples.** PCoA analysis

734 (Bray-Curtis) of skate and control samples. PC1 versus PC2 (A) and PC1 versus PC3 (B).

735 Sample distribution the same as in Figure 1.

736

737 **Figure 3: Alpha diversity of embryonic and adult skate bacterial communities.** Boxplots of

738 Shannon (A) and Chao1 (B) alpha diversity metrics for each sample site. Datapoints shown in  
739 black. Colored points are statistical outliers. Stage is indicated by shape. Grey: experimenters'  
740 hands, blue: water, red: egg capsule, orange: internal liquid, green: gill, and purple: skin.

741

742 **Figure 4: Source contributions to the little skate microbiota for each stage and tissue.**

743 Boxplots showing source contributions to the bacterial community of the skate microbiota at  
744 stage 0 (A), stage 16 (B), stage 26 (C), stage 30 (D), stage 33 (E) and adult (F) estimated using  
745 FEAST. Stage 0 used adult tissues as the source pools. Source contributions to adults (F) are  
746 shown for stage 33 source pools. Sources are colored as in Fig. 2. Letter codes refer to source

747 pools from the previous stage or controls. H: Experimenters' hands, W: water; EC: egg capsule,  
748 IL: egg capsule internal liquid, G: gill, S: skin, U: unknown source.

749

750 **Table 1: Core taxonomic units shared between tissues**

751 List of taxa identified as part of the common core microbiota at a 75% presence cut-off in a least  
752 two of the following tissues: egg capsule, combined external gill (stages 26-30) and embryonic  
753 skin, internal gill (stage 33-adult), and adult skin.

754

755 **Supplementary Figure 1: Internal liquid and egg capsule sampling locations.** Egg capsules  
756 were windowed to access the developing embryo. Black arrowheads indicate the internal surface  
757 of the egg capsule. White arrowhead in A indicates where the transparent, gelatinous internal  
758 liquid of closed egg capsules was collected. Open egg capsules were directly drained into  
759 microcentrifuge tubes before windowing.

760

761 **Supplementary Figure 2: ASV rarefaction curves of samples.** While number of reads varied  
762 between samples, species richness plateaus for each below the maximum sequencing depth.

763

764 **Supplementary Figure 3: Family-level composition of embryonic and adult skate bacterial  
765 communities.** Relative abundance of the top ten bacterial families in the classes

766 *Alphaproteobacteria* (A), *Gammaproteobacteria* (B), and *Bacteroidia* (C) in the dataset are  
767 shown for each site and timepoint as well as for water and hand controls.

768

769 **Supplementary Figure 4: Genus-level composition of embryonic and adult skate bacterial**  
770 **communities.** Relative abundance of the top ten bacterial genera in the classes

771 *Alphaproteobacteria* (A), *Gammaproteobacteria* (B), and *Bacteroidia* (C) in the dataset are  
772 shown for each site and timepoint as well as for water and hand controls.

773

774 **Supplementary Figure 5: Principal coordinate analysis plots of bacterial communities by**  
775 **tissue.** PCoA analysis (Bray-Curtis) plots of PC1 versus PC2 for (A) egg capsule, (B) Internal  
776 liquid, (C) gill, and (D) skin samples.

777

778 **Supplementary Figure 6: Differentially abundant bacterial taxa among skate tissues.**

779 LEfSe analysis at  $P < 0.05$  and  $LDA > 2$ . Only differentially abundant tree branches are shown.

780 eggcase: egg capsule, Egillskin: embryonic external gills (stages 16–30) and embryonic skin

781 (stages 16–33), Lgill: internal gill (stage 33-Adult), adultskin: adult skin.

782

783 **Supplementary Figure 7: Significant taxa comparisons in closed versus open egg capsules.**

784 Heatmap of the taxa identified by LEfSe ( $P < 0.05$ ,  $LDA > 2$ ) at the lowest categorized taxonomic

785 level for comparisons of open versus closed egg capsule (red), internal liquid (orange) and

786 combined egg capsule and internal liquid (black). Abundances of each sample are shown as Z-

787 scores. Open samples include stage 30 replicates A & D, as well as all stage 33 samples. All

788 other samples come from closed egg capsules.

789

790

791

792

793

794

795

796 **FIGURES**

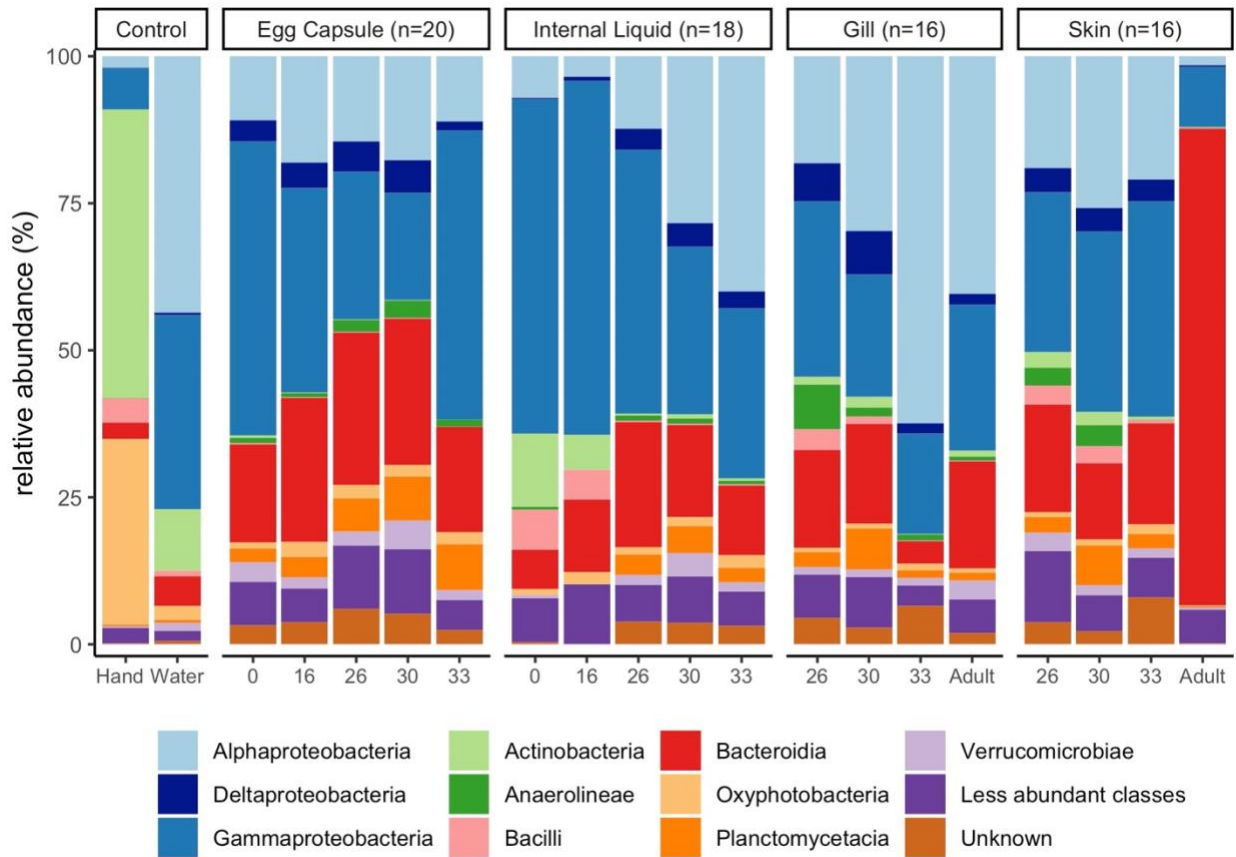

797

798 **Figure 1: Taxonomic composition of embryonic and adult skate bacterial communities.**

799 Relative abundance of the top ten bacterial classes in the dataset are shown for each site and

800 timepoint as well as for water and hand controls. First, classes of phylum *Proteobacteria* are

801 shown in shades of blue, followed by other classes ordered alphabetically. For the controls, n=4

802 for hand and n=8 for water samples.

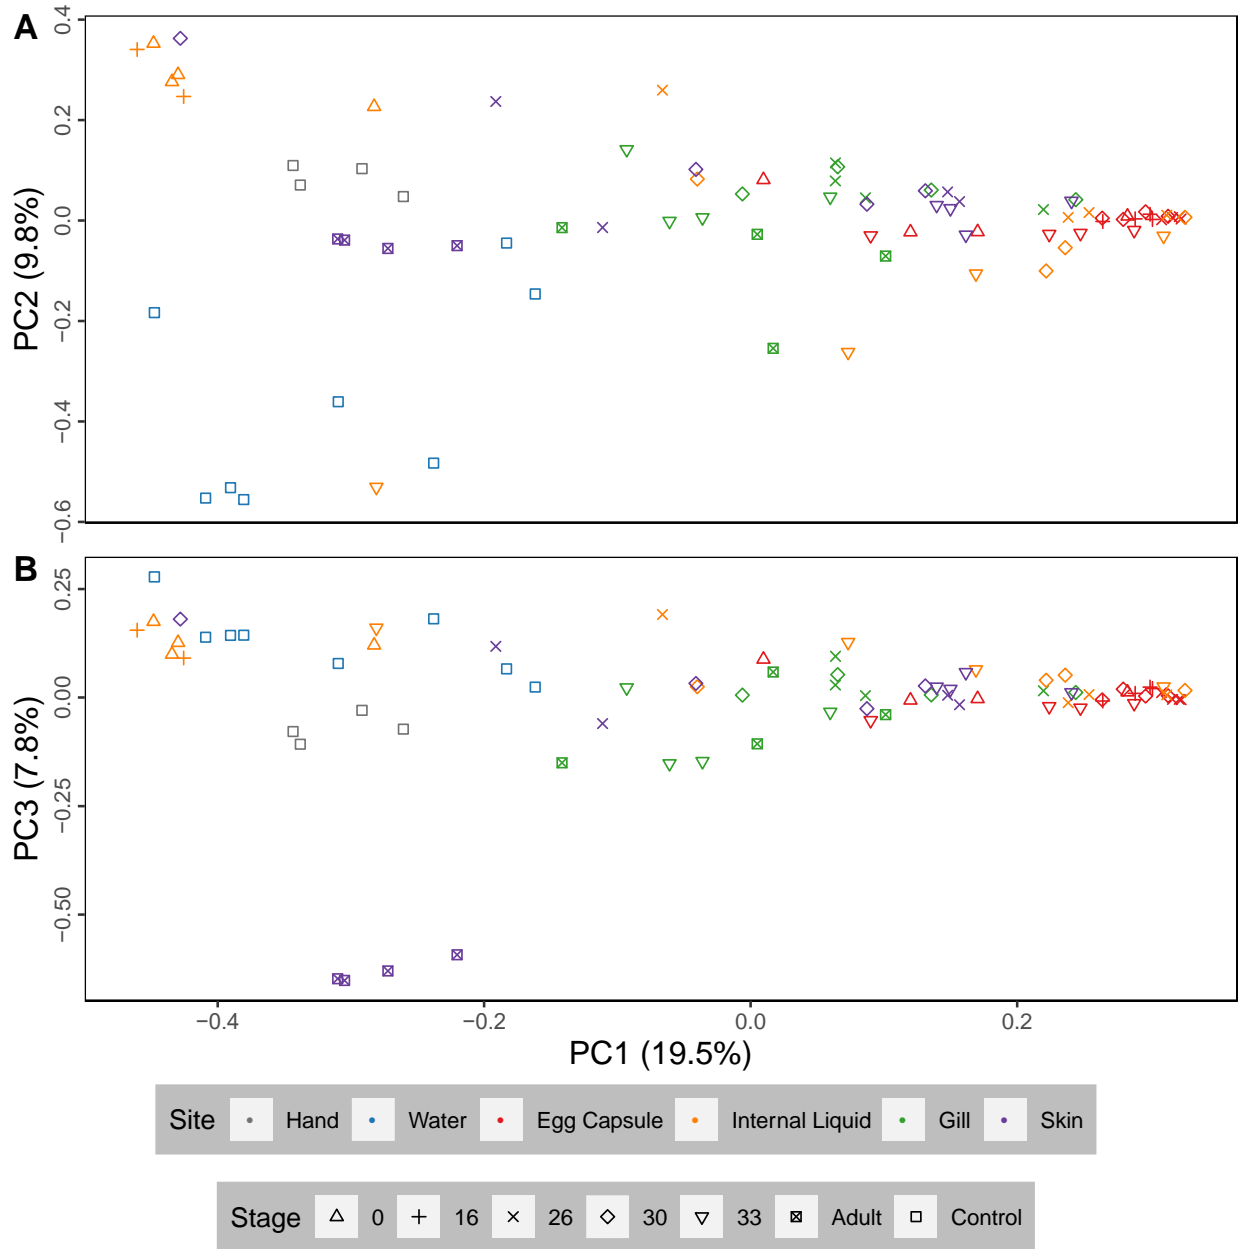

803

804 **Figure 2: Principal coordinate analysis plots of little skate bacterial samples.** PCoA analysis

805 (Bray-Curtis) of skate and control samples. PC1 versus PC2 (A) and PC1 versus PC3 (B).

806 Sample distribution the same as in Figure 1.

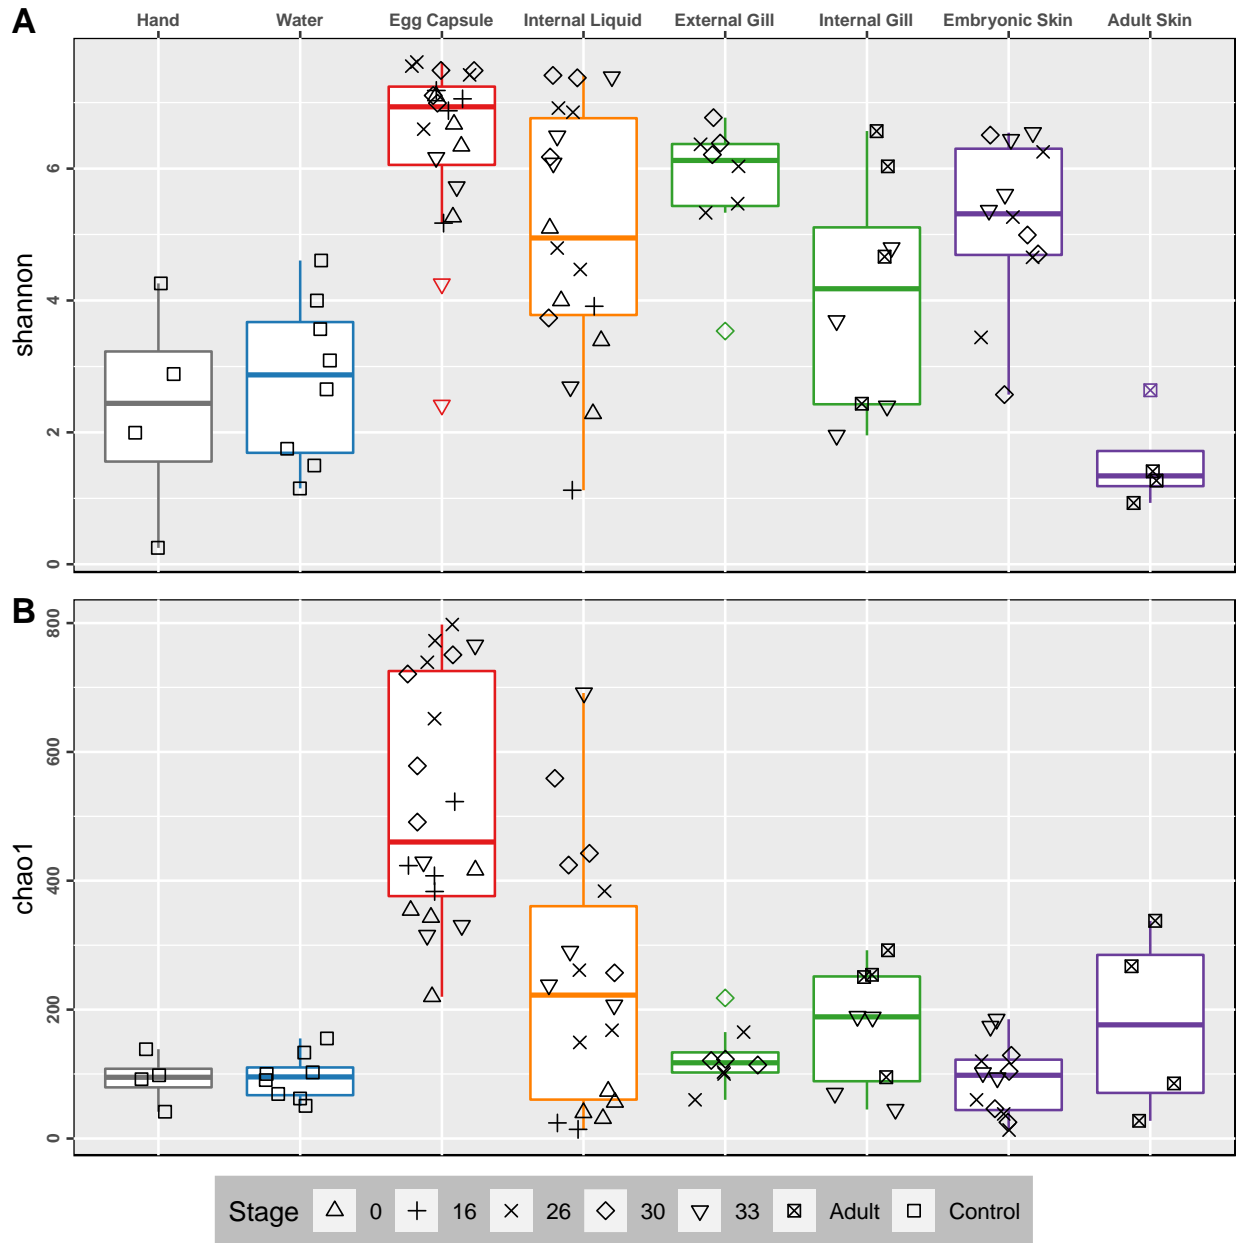

807

808 **Figure 3: Alpha diversity of embryonic and adult skate bacterial communities.** Boxplots of

809 Shannon (A) and Chao1 (B) alpha diversity metrics for each sample site. Datapoints shown in

810 black. Colored points are statistical outliers. Stage is indicated by shape. Grey: experimenters'

811 hands, blue: water, red: egg capsule, orange: internal liquid, green: gill, and purple: skin.

812

813

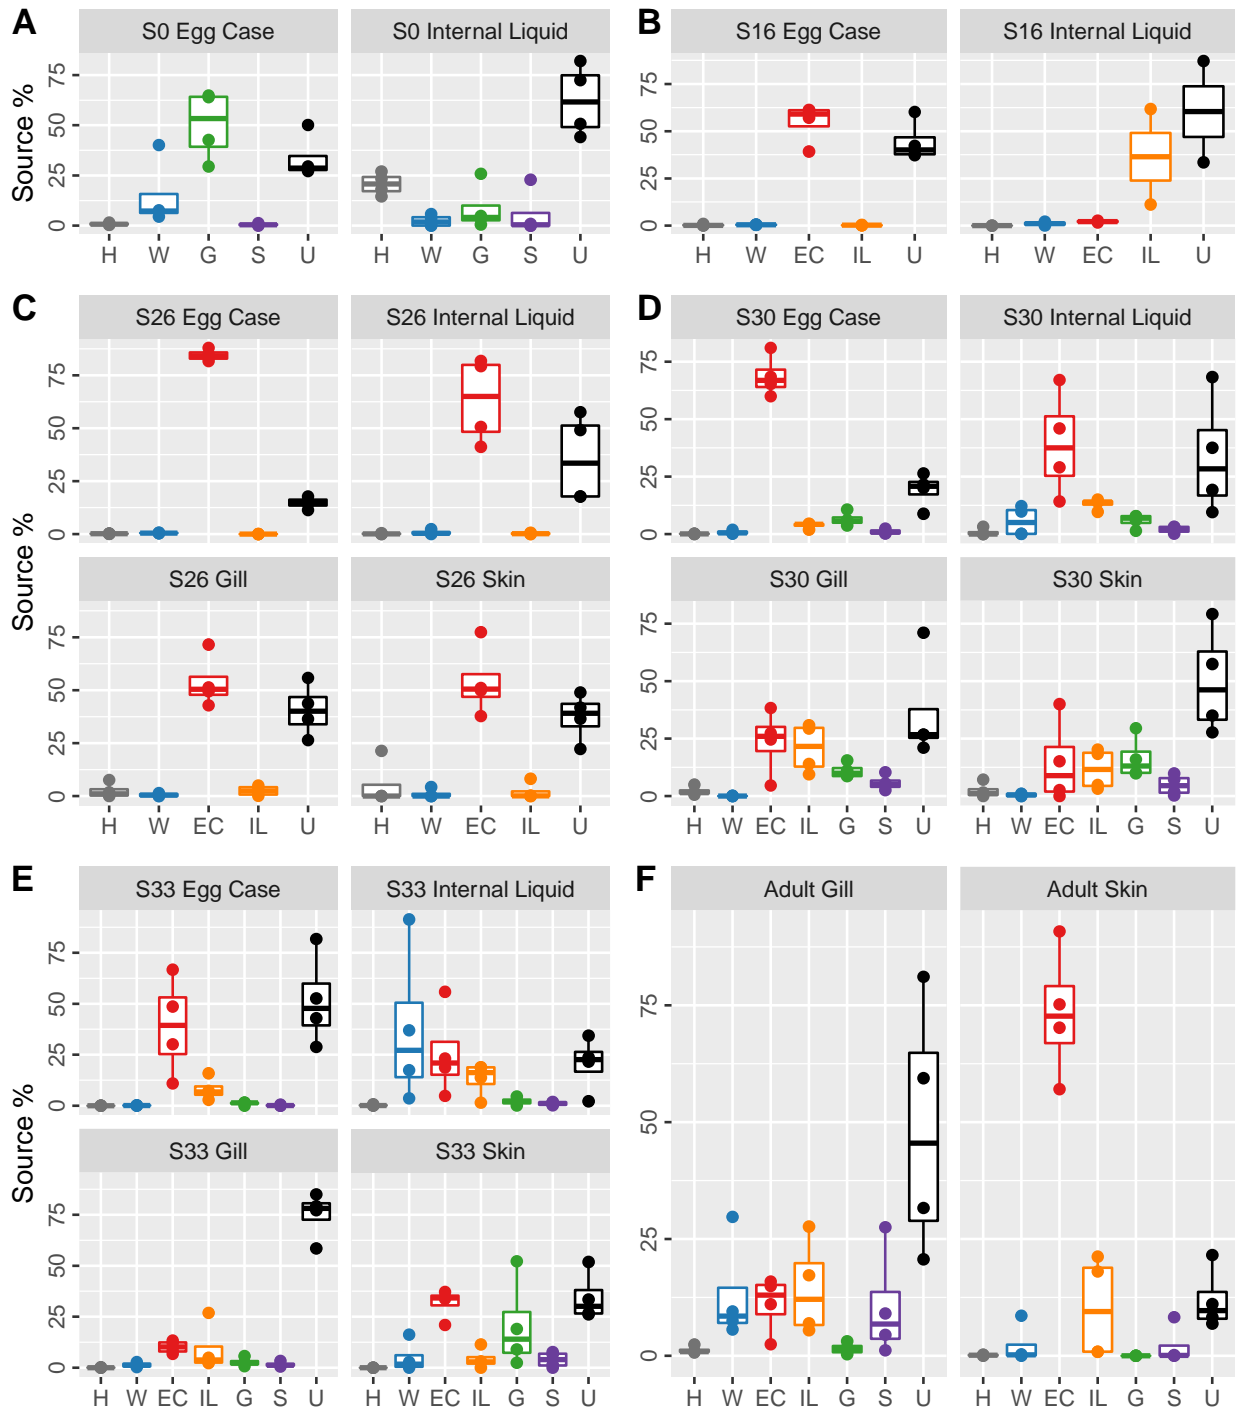

814

815 **Figure 4: Source contributions to the little skate microbiota for each stage and tissue.**

816 Boxplots showing source contributions to the bacterial community of the skate microbiota at

817 stage 0 (A), stage 16 (B), stage 26 (C), stage 30 (D), stage 33 (E) and adult (F) estimated using

818 FEAST. Stage 0 used adult tissues as the source pools. Source contributions to adults (F) are  
 819 shown for stage 33 source pools. Sources are colored as in Fig. 2. Letter codes refer to source  
 820 pools from the previous stage or controls. H: Experimenters' hands, W: water; EC: egg capsule,  
 821 IL: egg capsule internal liquid, G: gill, S: skin, U: unknown source.  
 822

| Taxa                             | Egg Capsule | External Gill/<br>Embryonic Skin | Internal Gill | Adult Skin |
|----------------------------------|-------------|----------------------------------|---------------|------------|
| <i>Actinomarinales</i>           | x           |                                  |               | x          |
| <i>Alphaproteobacteria</i>       | x           | x                                | x             | x          |
| <i>Bacteroidia</i>               | x           | x                                |               | x          |
| <i>Burkholderiaceae</i>          | x           |                                  |               | x          |
| <i>Candidatus Nitrosopumilus</i> | x           |                                  | x             |            |
| <i>Chloroplast</i>               | x           |                                  | x             | x          |
| <i>Colwellia</i>                 | x           |                                  | x             | x          |
| <i>Escherichia-Shigella</i>      | x           | x                                | x             |            |
| <i>Flavobacteriaceae</i>         | x           | x                                | x             | x          |
| <i>Flavobacteriales</i>          | x           |                                  |               | x          |
| <i>Gammaproteobacteria</i>       | x           | x                                | x             | x          |
| <i>Haliaceae</i>                 | x           | x                                |               | x          |
| <i>Lentisphaera</i>              | x           |                                  | x             | x          |
| <i>Pirellulaceae</i>             | x           | x                                | x             | x          |
| <i>Pseudoalteromonas</i>         | x           |                                  | x             | x          |
| <i>Pseudomonas</i>               | x           |                                  |               | x          |
| <i>Rhizobiaceae</i>              | x           |                                  | x             | x          |
| <i>Rhodobacteraceae</i>          | x           | x                                | x             | x          |
| <i>Rhodothermaceae</i>           | x           |                                  |               | x          |
| <i>Rubritalea</i>                | x           |                                  |               | x          |
| <i>Saprospiraceae</i>            | x           | x                                | x             | x          |
| <i>SAR11 clade (Clade I)</i>     | x           |                                  | x             | x          |
| <i>Shewanella</i>                | x           |                                  | x             |            |
| <i>Sphingomonadaceae</i>         | x           |                                  | x             | x          |
| <i>Sulfitobacter</i>             | x           |                                  |               | x          |
| <i>Synechococcus CC9902</i>      | x           |                                  | x             |            |



|                                              |   |  |   |   |
|----------------------------------------------|---|--|---|---|
| <i>Thermoanaerobaculaceae</i><br>Subgroup 10 | x |  |   | x |
| <i>Thiothrix</i> sp. FBR0112                 | x |  |   | x |
| <i>Ulvibacter</i>                            | x |  | x |   |
| Uncultured verrucomicrobium<br>DEV007        | x |  | x |   |
| <i>Verrucomicrobium</i> sp. KLE1210          | x |  |   | x |
| <i>Vibrio</i>                                | x |  |   | x |
| <i>Vibrionaceae</i>                          | x |  | x | x |

823

824 **Table 1: Core taxonomic units shared between tissues**

825 List of taxa identified as part of the common core microbiota at a 75% presence cut-off in a least  
826 two of the following tissues: egg capsule, combined external gill (stages 26-30) and embryonic  
827 skin, internal gill (stage 33-adult), and adult skin.

828

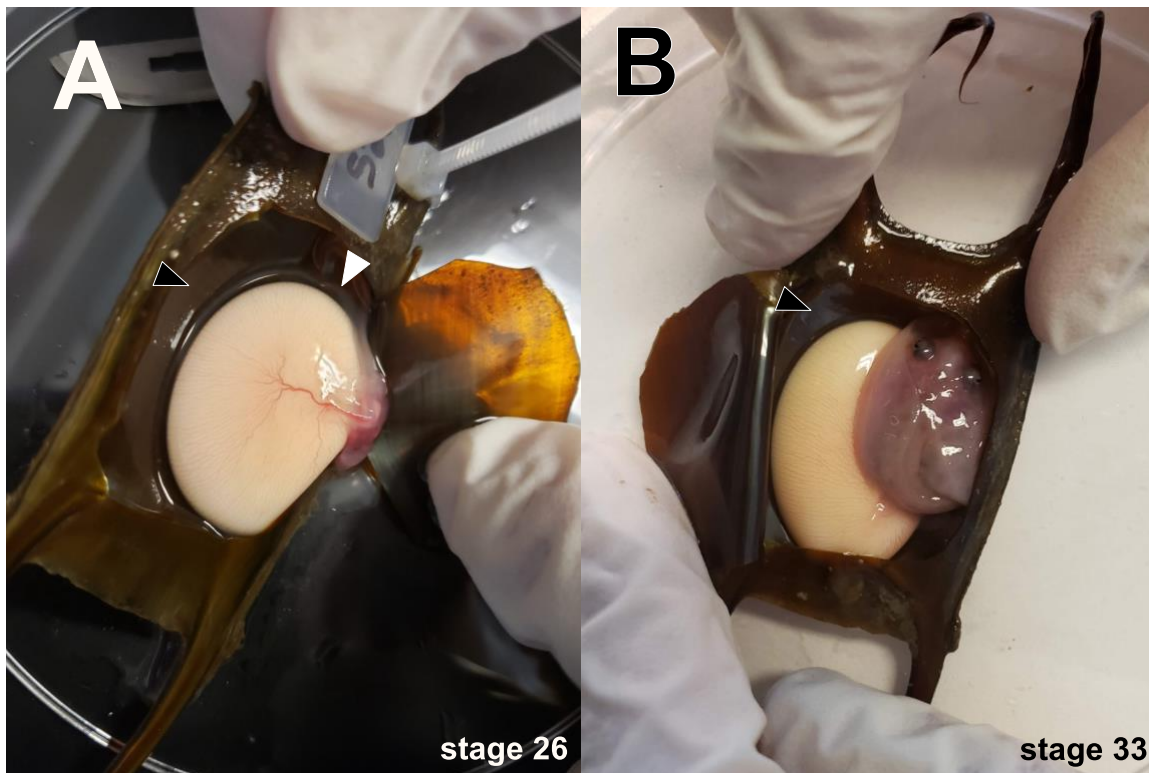

830 **Supplementary Figure 1: Internal liquid and egg capsule sampling locations.** Egg capsules  
831 were windowed to access the developing embryo. Black arrowheads indicate the internal surface  
832 of the egg capsule. White arrowhead in A indicates where the transparent, gelatinous internal  
833 liquid of closed egg capsules was collected. Open egg capsules were directly drained into  
834 microcentrifuge tubes before windowing.  
835

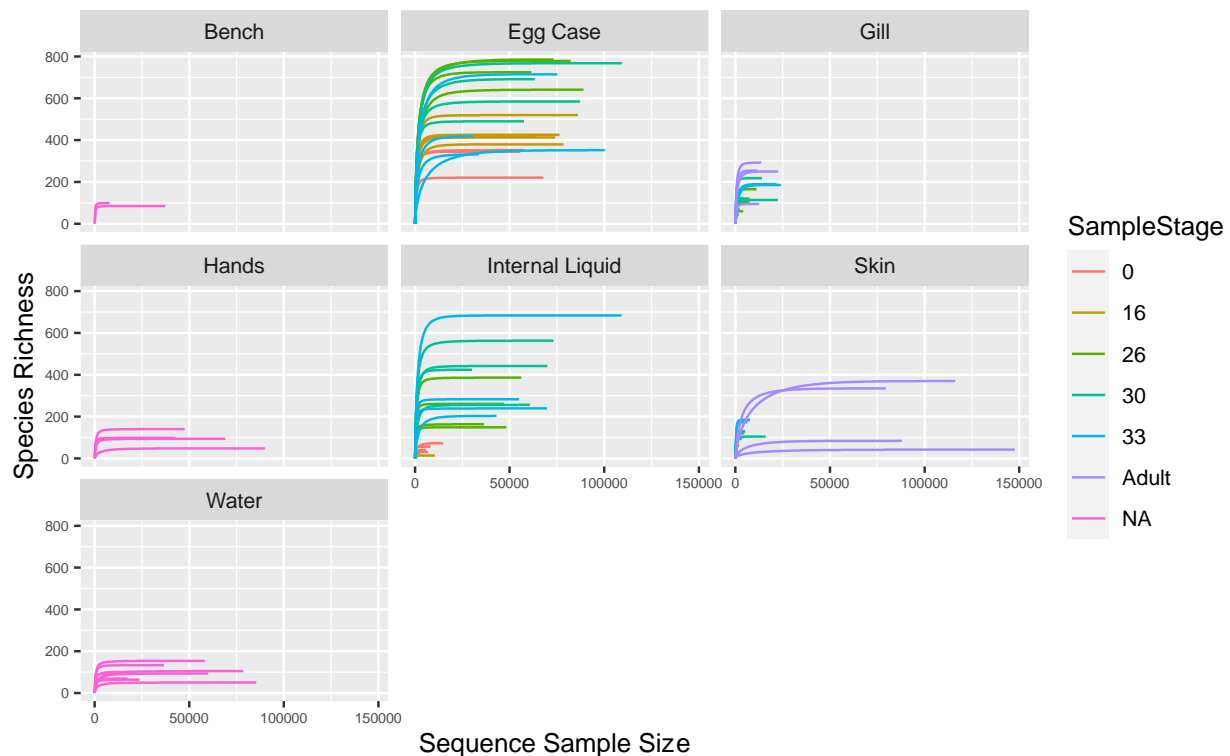

836  
837 **Supplementary Figure 2: ASV rarefaction curves of samples.** While number of reads varied  
838 between samples, species richness plateaus for each below the maximum sequencing depth.  
839

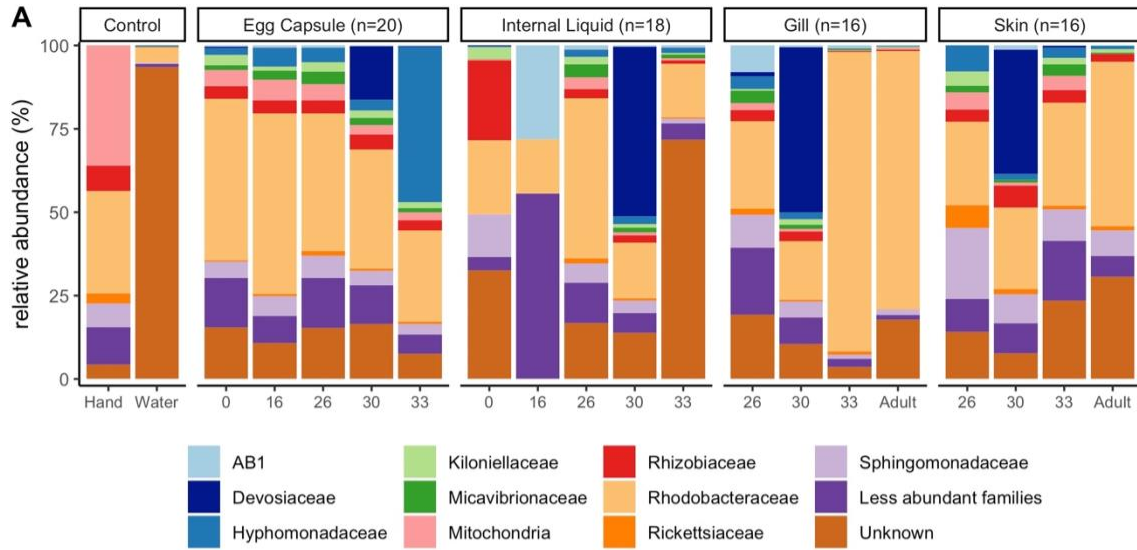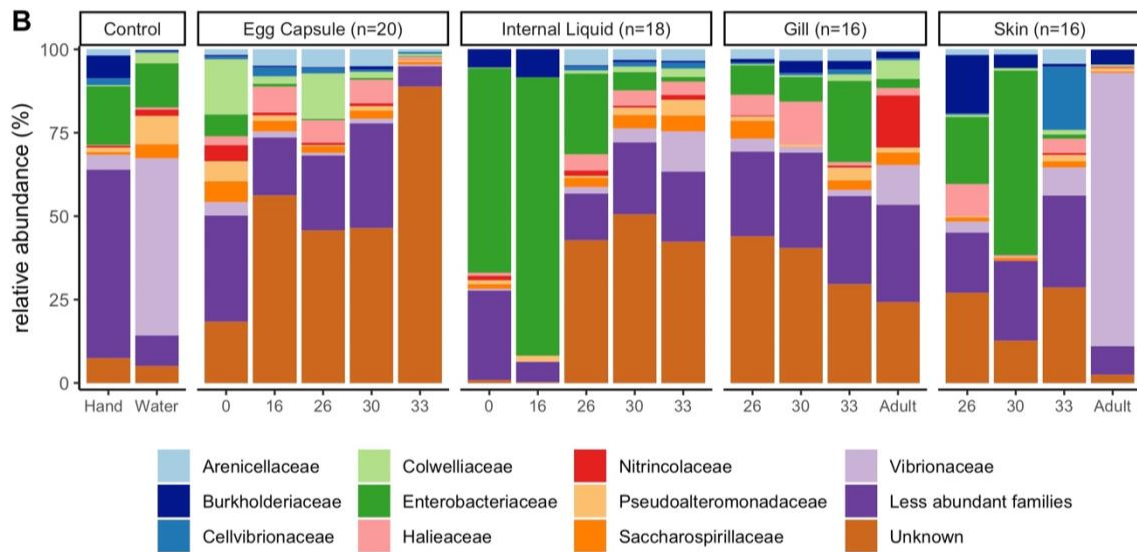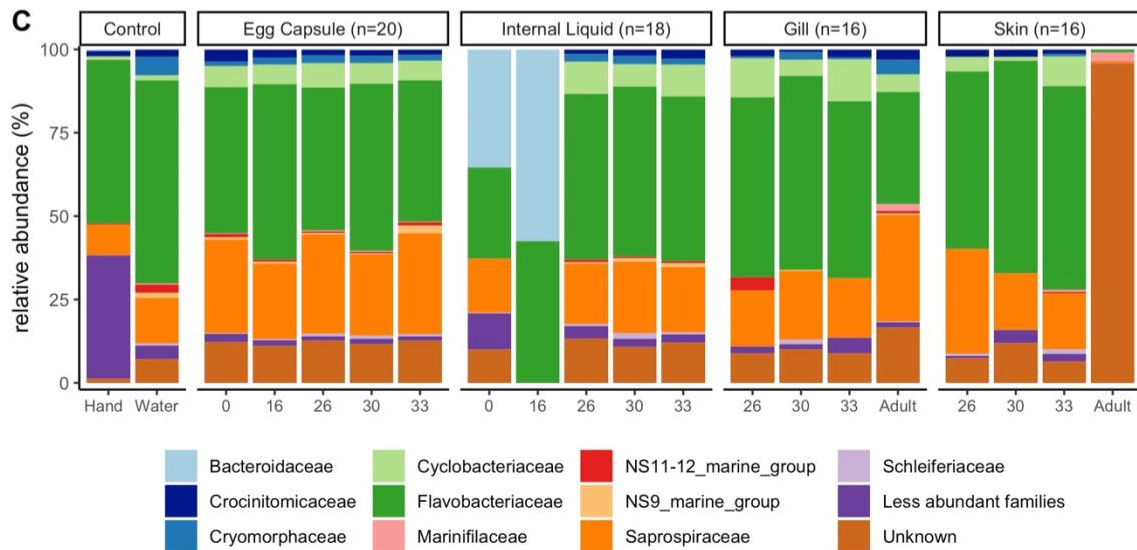

841 **Supplementary Figure 3: Family-level composition of embryonic and adult skate bacterial**  
842 **communities.** Relative abundance of the top ten bacterial families in the classes  
843 *Alphaproteobacteria* (A), *Gammaproteobacteria* (B), and *Bacteroidia* (C) in the dataset are  
844 shown for each site and timepoint as well as for water and hand controls. For the controls, n=4  
845 for hand and n=8 for water samples.  
846

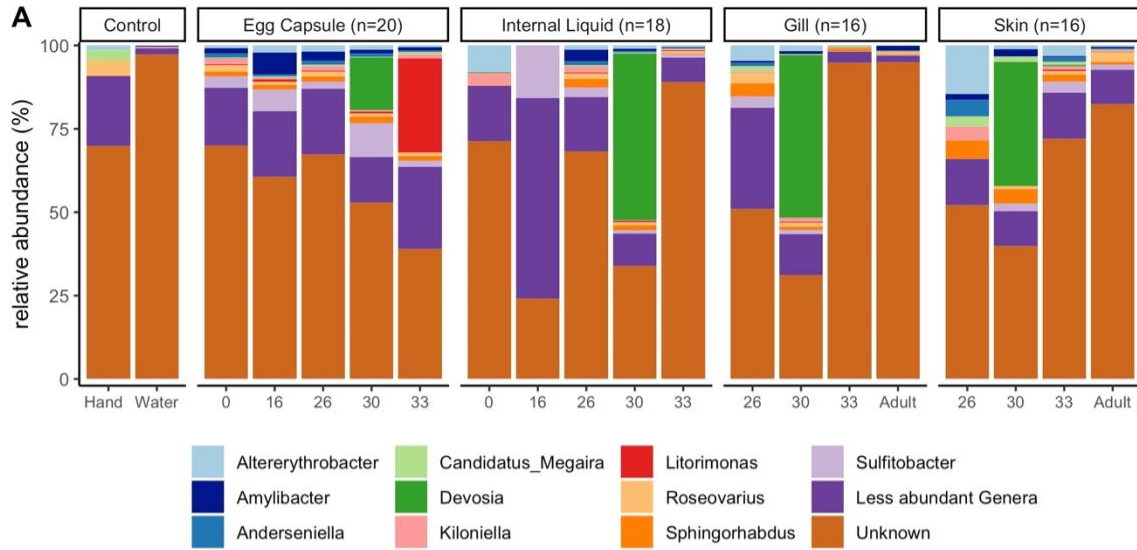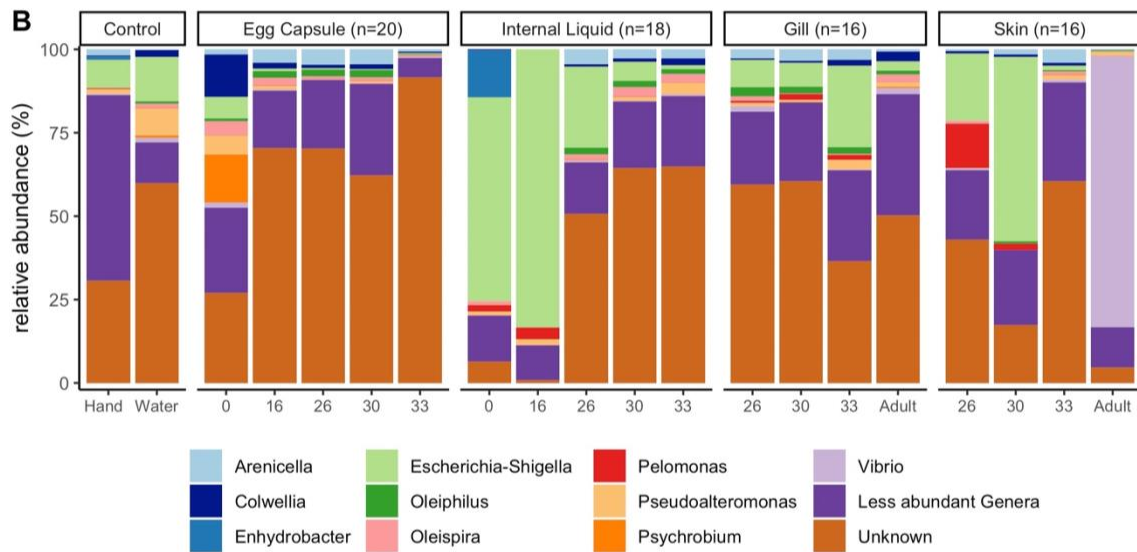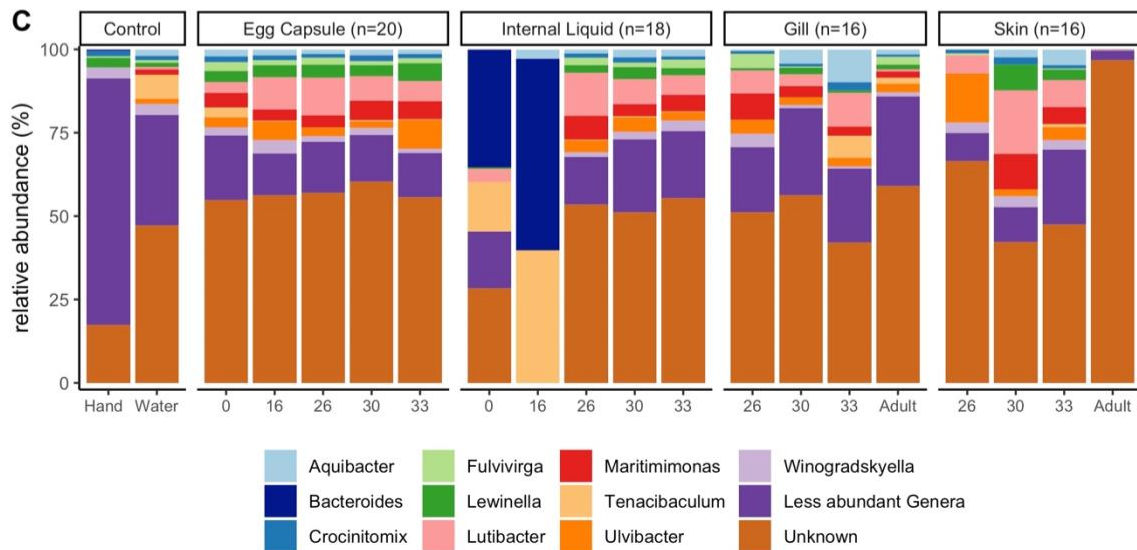

848 **Supplementary Figure 4: Genus-level composition of embryonic and adult skate bacterial**  
849 **communities.** Relative abundance of the top ten bacterial genera in the classes  
850 *Alphaproteobacteria* (A), *Gammaproteobacteria* (B), and *Bacteroidia* (C) in the dataset are  
851 shown for each site and timepoint as well as for water and hand controls. For the controls, n=4  
852 for hand and n=8 for water samples.  
853  
854

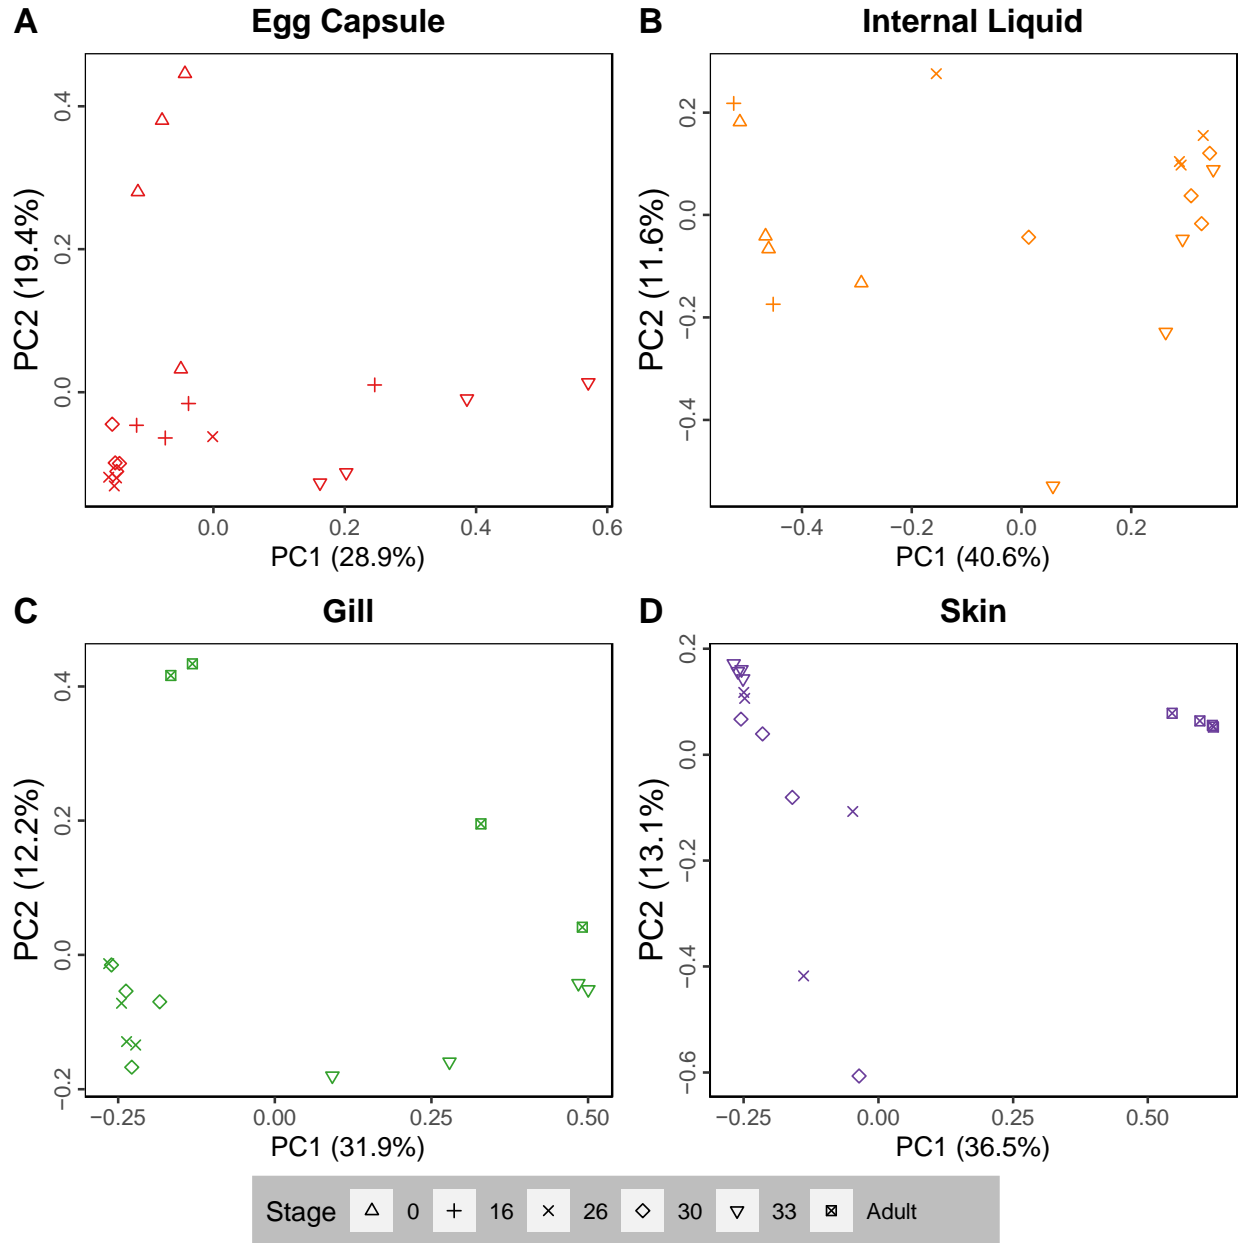

855

856 **Supplementary Figure 5: Principal coordinate analysis plots of bacterial communities by**

857 **tissue.** PCoA analysis (Bray-Curtis) plots of PC1 versus PC2 for (A) egg capsule, (B) Internal

858 liquid, (C) gill, and (D) skin samples.

859

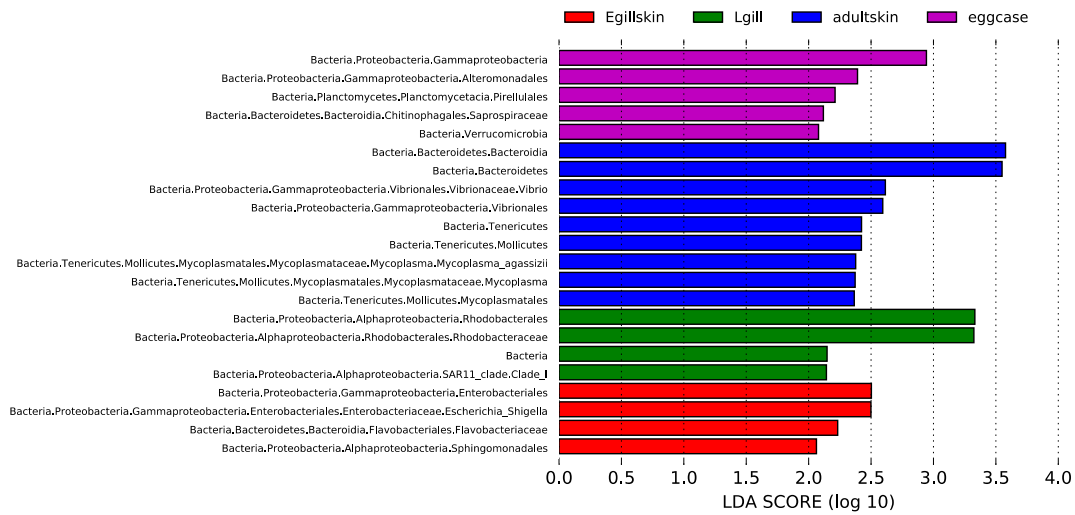

860

861 **Supplementary Figure 6: Differentially abundant bacterial taxa among skate tissues.**

862 LEfSe analysis at  $P < 0.05$  and  $LDA > 2$ . Only differentially abundant tree branches are shown.

863 eggcase: egg capsule, Egillskin: embryonic external gills (stages 16–30) and embryonic skin

864 (stages 16–33), Lgill: internal gill (stage 33-Adult), adultskin: adult skin.

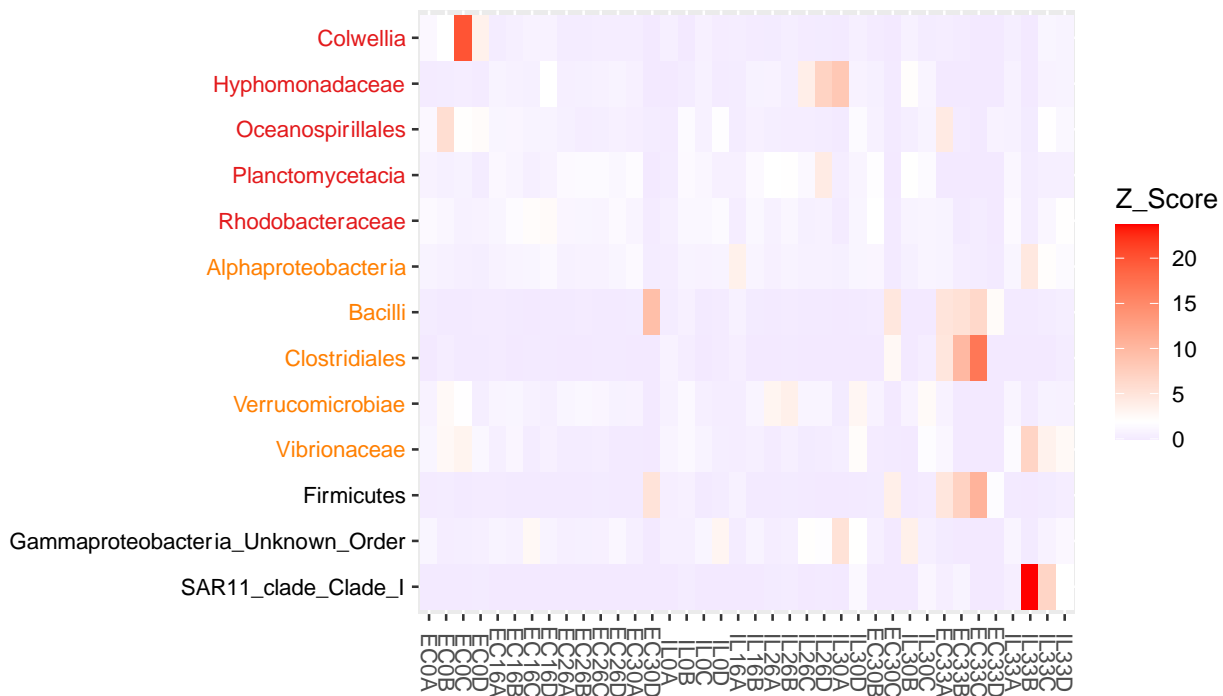

865

866 **Supplementary Figure 7: Significant taxa comparisons in closed versus open egg capsules.**



867 Heatmap of the taxa identified by LEfSe ( $P < 0.05$ ,  $LDA > 2$ ) at the lowest categorized taxonomic  
868 level for comparisons of open versus closed egg capsule (red), internal liquid (orange) and  
869 combined egg capsule and internal liquid (black). Abundances of each sample are shown as Z-  
870 scores. Open samples include stage 30 replicates A & D, as well as all stage 33 samples. All  
871 other samples come from closed egg capsules.

872 **Supplementary Table 1: Sample amplification results**

873 [Table S1 Amplification.xlsx](#)

874 **Supplementary Table 2: Sample reads summary statistics**

875 [Table S2 Samples.xlsx](#)

876 **Supplementary Table 3: Complete core microbiota results**

877 [Table S3 Core Microbiota.xlsx](#)
